# Supplementary material for: Emergence of recombinant SARS-CoV-2 variants in California, 2020-2022
Source: Preprints.org preprint supplement (doi:10.20944/preprints202406.1937.v1), 2024-06-27
Supplement: Supplementary file 1 [file supplementary]

## Sheet: FINAL DATA
Sample	county	Region	collection_date	pango_lineage	gisaid_accession
921	Santa Clara	ABAHO	2022-02-09	Unclassified	EPI_ISL_10232220
925	Sacramento	Greater Sac	2022-02-13	Unclassified	EPI_ISL_10378301
922	Los Angeles	Southern CA	2022-02-11	Unclassified	EPI_ISL_10402507
923	Los Angeles	Southern CA	2022-02-11	Unclassified	EPI_ISL_10478970
927	Los Angeles	Southern CA	2022-02-15	Unclassified	EPI_ISL_10567701
928	Alameda	ABAHO	2022-02-16	Unclassified	EPI_ISL_10568546
929	Alameda	ABAHO	2022-02-16	Unclassified	EPI_ISL_10568560
924	Riverside	Southern CA	2022-02-11	Unclassified	EPI_ISL_10624443
931	Los Angeles	Southern CA	2022-02-22	Unclassified	EPI_ISL_10779133
938	Los Angeles	Southern CA	2022-03-03	Unclassified	EPI_ISL_11170429
19	Unknown	Unknown	2021-03-15	XB	EPI_ISL_11175956
686	Imperial	Southern CA	2021-07-09	XB	EPI_ISL_11292147
604	Contra Costa	ABAHO	2021-06-24	Unclassified	EPI_ISL_11294191
785	Placer	Greater Sac	2021-07-23	Unclassified	EPI_ISL_11294398
934	Solano	ABAHO	2022-02-26	Unclassified	EPI_ISL_11342837
946	Alameda	ABAHO	2022-03-14	XE	EPI_ISL_11352496
930	San Diego	Southern CA	2022-02-19	XM	EPI_ISL_11410014
950	Los Angeles	Southern CA	2022-03-15	Unclassified	EPI_ISL_11529230
949	San Bernardino	Southern CA	2022-03-15	Unclassified	EPI_ISL_11570536
951	San Bernardino	Southern CA	2022-03-15	Unclassified	EPI_ISL_11570558
954	Unknown	SJVC	2022-03-18	Unclassified	EPI_ISL_11697387
961	Alameda	ABAHO	2022-03-19	Unclassified	EPI_ISL_11697481
953	San Bernardino	Southern CA	2022-03-18	Unclassified	EPI_ISL_11757329
962	San Diego	Southern CA	2022-03-20	XZ	EPI_ISL_11757732
964	Alameda	ABAHO	2022-03-21	Unclassified	EPI_ISL_11758203
966	Alameda	ABAHO	2022-03-21	Unclassified	EPI_ISL_11758208
967	Alameda	ABAHO	2022-03-21	Unclassified	EPI_ISL_11758210
969	Orange	Southern CA	2022-03-23	XE	EPI_ISL_11759252
968	Los Angeles	Southern CA	2022-03-22	Unclassified	EPI_ISL_11790806
970	Los Angeles	Southern CA	2022-03-26	Unclassified	EPI_ISL_11791638
935	Los Angeles	Southern CA	2022-02-28	XM	EPI_ISL_11861980
944	Santa Clara	ABAHO	2022-03-13	Unclassified	EPI_ISL_11899456
945	Santa Clara	ABAHO	2022-03-13	Unclassified	EPI_ISL_11899457
942	Ventura	Southern CA	2022-03-09	Unclassified	EPI_ISL_11973604
972	Santa Barbara	Southern CA	2022-03-28	XN	EPI_ISL_11997727
959	Alameda	ABAHO	2022-03-18	Unclassified	EPI_ISL_12003754
956	Alameda	ABAHO	2022-03-18	Unclassified	EPI_ISL_12003755
955	Alameda	ABAHO	2022-03-18	Unclassified	EPI_ISL_12003756
958	Alameda	ABAHO	2022-03-18	Unclassified	EPI_ISL_12003758
957	Alameda	ABAHO	2022-03-18	Unclassified	EPI_ISL_12003759
960	San Diego	Southern CA	2022-03-19	XZ	EPI_ISL_12003788
993	Unknown	ABAHO	2022-04-04	XZ	EPI_ISL_12009425
988	Unknown	Southern CA	2022-04-03	XE	EPI_ISL_12009652
974	San Francisco	ABAHO	2022-03-29	XE	EPI_ISL_12046447
984	San Mateo	ABAHO	2022-04-01	XZ	EPI_ISL_12048016
996	San Diego	Southern CA	2022-04-05	Unclassified	EPI_ISL_12048913
973	San Bernardino	Southern CA	2022-03-28	Unclassified	EPI_ISL_12111895
987	Orange	Southern CA	2022-04-02	Unclassified	EPI_ISL_12114152
985	Contra Costa	ABAHO	2022-04-02	XE	EPI_ISL_12166808
1014	Marin	ABAHO	2022-04-11	XE	EPI_ISL_12170376
1000	Los Angeles	Southern CA	2022-04-06	XZ	EPI_ISL_12272210
999	Los Angeles	Southern CA	2022-04-06	XZ	EPI_ISL_12272211
1007	Los Angeles	Southern CA	2022-04-07	XZ	EPI_ISL_12272367
1015	Alameda	ABAHO	2022-04-11	XE	EPI_ISL_12274136
963	Sacramento	Greater Sac	2022-03-21	XZ	EPI_ISL_12295774
943	Lake	RANCHO	2022-03-09	Unclassified	EPI_ISL_12296271
1009	Los Angeles	Southern CA	2022-04-08	XE	EPI_ISL_12299375
1017	Contra Costa	ABAHO	2022-04-11	XE	EPI_ISL_12307941
940	Ventura	Southern CA	2022-03-07	Unclassified	EPI_ISL_12328100
941	Lake	RANCHO	2022-03-07	Unclassified	EPI_ISL_12328164
1040	Unknown	Unknown	2022-04-16	XE	EPI_ISL_12329712
1020	Alameda	ABAHO	2022-04-12	XE	EPI_ISL_12331658
1026	Sacramento	Greater Sac	2022-04-13	XE	EPI_ISL_12331746
983	Unknown	Unknown	2022-03-31	XZ	EPI_ISL_12384754
995	Santa Clara	ABAHO	2022-04-04	XE	EPI_ISL_12433077
1027	Contra Costa	ABAHO	2022-04-13	XE	EPI_ISL_12462617
975	El Dorado	Greater Sac	2022-03-30	XE	EPI_ISL_12485092
976	Sacramento	Greater Sac	2022-03-30	XE	EPI_ISL_12485121
998	Yolo	Greater Sac	2022-04-05	XE	EPI_ISL_12485198
991	Alameda	ABAHO	2022-04-04	XE	EPI_ISL_12485312
992	Contra Costa	ABAHO	2022-04-04	XL	EPI_ISL_12485316
1050	Los Angeles	Southern CA	2022-04-19	XZ	EPI_ISL_12497819
1024	Los Angeles	Southern CA	2022-04-12	XE	EPI_ISL_12500441
1037	Contra Costa	ABAHO	2022-04-15	XE	EPI_ISL_12500779
1087	Unknown	SJVC	2022-04-25	XE	EPI_ISL_12504520
1084	Unknown	Unknown	2022-04-25	XE	EPI_ISL_12504748
1062	Orange	Southern CA	2022-04-20	XL	EPI_ISL_12530732
1038	Alameda	ABAHO	2022-04-16	XE	EPI_ISL_12541109
1044	Alameda	ABAHO	2022-04-18	XE	EPI_ISL_12541572
1069	Sacramento	Greater Sac	2022-04-22	XE	EPI_ISL_12564701
1043	Ventura	Southern CA	2022-04-18	Unclassified	EPI_ISL_12596122
1042	Ventura	Southern CA	2022-04-18	Unclassified	EPI_ISL_12605615
1048	Ventura	Southern CA	2022-04-18	Unclassified	EPI_ISL_12605621
1071	Santa Cruz	ABAHO	2022-04-22	XE	EPI_ISL_12612634
1002	Unknown	Unknown	2022-04-06	XZ	EPI_ISL_12615361
1016	Unknown	Unknown	2022-04-11	XE	EPI_ISL_12615447
971	San Diego	Southern CA	2022-03-26	XZ	EPI_ISL_12615586
1064	Orange	Southern CA	2022-04-21	XZ	EPI_ISL_12618638
1080	Sacramento	Greater Sac	2022-04-25	XQ	EPI_ISL_12619739
1104	Riverside	Southern CA	2022-04-27	XL	EPI_ISL_12621450
1025	Contra Costa	ABAHO	2022-04-12	XE	EPI_ISL_12625567
1102	Los Angeles	Southern CA	2022-04-27	Unclassified	EPI_ISL_12638483
1106	Sacramento	Greater Sac	2022-04-29	Unclassified	EPI_ISL_12638757
1109	San Bernardino	Southern CA	2022-04-29	XE	EPI_ISL_12638815
1119	San Bernardino	Southern CA	2022-04-30	XE	EPI_ISL_12638978
1061	Los Angeles	Southern CA	2022-04-20	XL	EPI_ISL_12640469
1078	Los Angeles	Southern CA	2022-04-24	XAC	EPI_ISL_12641010
1086	Los Angeles	Southern CA	2022-04-25	Unclassified	EPI_ISL_12641135
1081	Los Angeles	Southern CA	2022-04-25	XE	EPI_ISL_12641410
1115	Unknown	Southern CA	2022-04-29	XE	EPI_ISL_12642837
1107	Unknown	Southern CA	2022-04-29	XZ	EPI_ISL_12642893
1096	Santa Clara	ABAHO	2022-04-26	XAA	EPI_ISL_12653320
1108	Riverside	Southern CA	2022-04-29	XE	EPI_ISL_12655560
1125	Contra Costa	ABAHO	2022-05-01	XZ	EPI_ISL_12656431
1134	Sacramento	Greater Sac	2022-05-02	XE	EPI_ISL_12657113
1135	Orange	Southern CA	2022-05-02	XE	EPI_ISL_12657207
1075	Ventura	Southern CA	2022-04-23	XE	EPI_ISL_12659285
1074	Los Angeles	Southern CA	2022-04-23	XE	EPI_ISL_12659407
1030	Unknown	Unknown	2022-04-13	XE	EPI_ISL_12692632
693	Contra Costa	ABAHO	2021-07-09	XB	EPI_ISL_12692972
631	Sacramento	Greater Sac	2021-06-29	XB	EPI_ISL_12692978
777	Riverside	Southern CA	2021-07-20	Unclassified	EPI_ISL_12692997
730	Sacramento	Greater Sac	2021-07-15	XB	EPI_ISL_1269332
666	Stanislaus	SJVC	2021-07-06	XB	EPI_ISL_1269333
793	Contra Costa	ABAHO	2021-07-25	XB	EPI_ISL_126939
978	San Diego	Southern CA	2022-03-30	XZ	EPI_ISL_12697347
1137	Orange	Southern CA	2022-05-02	Unclassified	EPI_ISL_12711659
1132	San Diego	Southern CA	2022-05-02	Unclassified	EPI_ISL_12711669
1133	San Diego	Southern CA	2022-05-02	Unclassified	EPI_ISL_12711768
1143	San Diego	Southern CA	2022-05-03	XL	EPI_ISL_12711862
1138	Los Angeles	Southern CA	2022-05-03	Unclassified	EPI_ISL_12711911
1142	San Diego	Southern CA	2022-05-03	XL	EPI_ISL_12712217
1103	Los Angeles	Southern CA	2022-04-27	XAP	EPI_ISL_12719546
1165	San Diego	Southern CA	2022-05-06	XE	EPI_ISL_12740619
1116	Santa Cruz	ABAHO	2022-04-29	XZ	EPI_ISL_12745468
1114	Sacramento	Greater Sac	2022-04-29	XZ	EPI_ISL_12745544
1156	Sacramento	Greater Sac	2022-05-05	Unclassified	EPI_ISL_12761357
1154	Riverside	Southern CA	2022-05-05	XL	EPI_ISL_12763894
1163	Contra Costa	ABAHO	2022-05-06	Unclassified	EPI_ISL_12764778
1173	Unknown	ABAHO	2022-05-07	XAC	EPI_ISL_12767131
1170	Unknown	ABAHO	2022-05-06	XAC	EPI_ISL_12767537
1185	Orange	Southern CA	2022-05-09	XZ	EPI_ISL_12770670
1181	San Francisco	ABAHO	2022-05-09	XZ	EPI_ISL_12770694
1171	El Dorado	Greater Sac	2022-05-07	XE	EPI_ISL_12786292
1126	Los Angeles	Southern CA	2022-05-01	XY	EPI_ISL_12788692
1152	Los Angeles	Southern CA	2022-05-04	XAC	EPI_ISL_12789753
1019	Unknown	Southern CA	2022-04-12	XE	EPI_ISL_12833531
1065	Unknown	Unknown	2022-04-21	XE	EPI_ISL_12834931
1033	San Diego	Southern CA	2022-04-14	XM	EPI_ISL_12836690
1039	San Diego	Southern CA	2022-04-16	XM	EPI_ISL_12836718
1190	San Diego	Southern CA	2022-05-09	XZ	EPI_ISL_12864001
1186	San Diego	Southern CA	2022-05-09	Unclassified	EPI_ISL_12864070
1157	Los Angeles	Southern CA	2022-05-05	XAP	EPI_ISL_12867039
1159	Merced	SJVC	2022-05-06	XE	EPI_ISL_12867186
1174	Santa Cruz	ABAHO	2022-05-07	XZ	EPI_ISL_12867794
1177	Stanislaus	SJVC	2022-05-08	XE	EPI_ISL_12867910
1176	Santa Cruz	ABAHO	2022-05-08	XZ	EPI_ISL_12868071
1153	Los Angeles	Southern CA	2022-05-04	XZ	EPI_ISL_12874458
1036	Santa Cruz	ABAHO	2022-04-15	XE	EPI_ISL_12877894
1189	San Diego	Southern CA	2022-05-09	XE	EPI_ISL_12886219
1192	Fresno	SJVC	2022-05-09	Unclassified	EPI_ISL_12886382
1197	Los Angeles	Southern CA	2022-05-10	Unclassified	EPI_ISL_12887460
1203	Santa Clara	ABAHO	2022-05-10	Unclassified	EPI_ISL_12888257
1213	Los Angeles	Southern CA	2022-05-11	Unclassified	EPI_ISL_12888480
1141	San Diego	Southern CA	2022-05-03	XE	EPI_ISL_12890919
980	Contra Costa	ABAHO	2022-03-30	XE	EPI_ISL_12916349
1210	Contra Costa	ABAHO	2022-05-11	Unclassified	EPI_ISL_12923348
1219	Fresno	SJVC	2022-05-13	XAC	EPI_ISL_12923609
989	Humboldt	RANCHO	2022-04-03	XE	EPI_ISL_12924230
986	Monterey	ABAHO	2022-04-02	Unclassified	EPI_ISL_12924231
994	Sonoma	ABAHO	2022-04-04	XZ	EPI_ISL_12924992
1101	San Mateo	ABAHO	2022-04-27	XZ	EPI_ISL_12927342
1045	San Mateo	ABAHO	2022-04-18	XE	EPI_ISL_12927679
1083	San Mateo	ABAHO	2022-04-25	XZ	EPI_ISL_12927758
1089	San Mateo	ABAHO	2022-04-26	XZ	EPI_ISL_12927759
1158	Unknown	Southern CA	2022-05-05	XE	EPI_ISL_12962054
1167	Unknown	Unknown	2022-05-06	XAJ	EPI_ISL_12962282
1175	Unknown	Southern CA	2022-05-08	XE	EPI_ISL_12962348
1169	Unknown	Unknown	2022-05-06	XE	EPI_ISL_12962440
1161	Unknown	Southern CA	2022-05-06	XY	EPI_ISL_12962509
1162	Unknown	ABAHO	2022-05-06	XAP	EPI_ISL_12962642
1148	Unknown	Southern CA	2022-05-03	XAP	EPI_ISL_12962651
1146	Unknown	Southern CA	2022-05-03	XAP	EPI_ISL_12962847
1112	Unknown	Unknown	2022-04-29	XE	EPI_ISL_12963186
1191	Unknown	Unknown	2022-05-09	XL	EPI_ISL_12963375
1055	Unknown	Unknown	2022-04-19	XE	EPI_ISL_12963405
1120	Unknown	Southern CA	2022-04-30	XAQ	EPI_ISL_12963762
1123	Unknown	Southern CA	2022-04-30	XZ	EPI_ISL_12963800
1105	Unknown	Southern CA	2022-04-28	XAQ	EPI_ISL_12963892
1218	Unknown	Unknown	2022-05-12	XAC	EPI_ISL_12963935
1100	Unknown	Unknown	2022-04-26	XAM	EPI_ISL_12964390
1057	Unknown	Unknown	2022-04-19	XZ	EPI_ISL_12965476
1034	Unknown	Unknown	2022-04-14	XE	EPI_ISL_12965838
91	Merced	SJVC	2021-04-01	XB	EPI_ISL_12976200
627	Monterey	ABAHO	2021-06-28	XB	EPI_ISL_12976282
111	Ventura	Southern CA	2021-04-06	XB	EPI_ISL_12978159
83	Sutter	Greater Sac	2021-03-31	XB	EPI_ISL_12978772
1079	Sacramento	Greater Sac	2022-04-25	XE	EPI_ISL_13039870
1094	San Francisco	ABAHO	2022-04-26	XZ	EPI_ISL_13039926
1077	San Francisco	ABAHO	2022-04-24	XE	EPI_ISL_13040013
1082	Solano	ABAHO	2022-04-25	XZ	EPI_ISL_13040056
1136	Yolo	Greater Sac	2022-05-02	XZ	EPI_ISL_13040093
1130	Contra Costa	ABAHO	2022-05-02	XE	EPI_ISL_13040103
1113	San Mateo	ABAHO	2022-04-29	XE	EPI_ISL_13040150
1215	Orange	Southern CA	2022-05-12	XZ	EPI_ISL_13040242
1216	Orange	Southern CA	2022-05-12	XZ	EPI_ISL_13040242
1256	San Francisco	ABAHO	2022-05-18	XZ	EPI_ISL_13044306
1046	Contra Costa	ABAHO	2022-04-18	XE	EPI_ISL_13048367
1201	Unknown	Unknown	2022-05-10	XZ	EPI_ISL_13059343
1160	Sacramento	Greater Sac	2022-05-06	XZ	EPI_ISL_13060333
1188	Los Angeles	Southern CA	2022-05-09	XAM	EPI_ISL_13061215
1183	San Joaquin	SJVC	2022-05-09	XE	EPI_ISL_13061216
1180	Los Angeles	Southern CA	2022-05-09	XE	EPI_ISL_13061820
1270	Alameda	ABAHO	2022-05-22	XZ	EPI_ISL_13072281
1127	Sacramento	Greater Sac	2022-05-02	XZ	EPI_ISL_13074663
1139	Alameda	ABAHO	2022-05-03	XZ	EPI_ISL_13074740
1121	Contra Costa	ABAHO	2022-04-30	Unclassified	EPI_ISL_13074749
1118	Alameda	ABAHO	2022-04-30	XZ	EPI_ISL_13074766
1117	Sonoma	ABAHO	2022-04-30	XE	EPI_ISL_13074786
1265	Contra Costa	ABAHO	2022-05-20	Unclassified	EPI_ISL_13078346
1276	Orange	Southern CA	2022-05-22	Unclassified	EPI_ISL_13080180
1275	Orange	Southern CA	2022-05-22	Unclassified	EPI_ISL_13080255
1272	San Bernardino	Southern CA	2022-05-22	Unclassified	EPI_ISL_13080362
1284	Fresno	SJVC	2022-05-23	XE	EPI_ISL_13080504
1281	San Bernardino	Southern CA	2022-05-23	Unclassified	EPI_ISL_13080662
1179	Unknown	Unknown	2022-05-08	XE	EPI_ISL_13082566
1198	Unknown	Southern CA	2022-05-10	XE	EPI_ISL_13082603
1168	Unknown	Unknown	2022-05-06	XE	EPI_ISL_13082688
1291	Los Angeles	Southern CA	2022-05-24	XAF	EPI_ISL_13099197
1225	Los Angeles	Southern CA	2022-05-14	XL	EPI_ISL_13116327
1224	Los Angeles	Southern CA	2022-05-14	XL	EPI_ISL_13116368
1229	San Bernardino	Southern CA	2022-05-14	XE	EPI_ISL_13116423
1223	Los Angeles	Southern CA	2022-05-14	XW	EPI_ISL_13116454
1259	Los Angeles	Southern CA	2022-05-18	XE	EPI_ISL_13117220
1053	Alameda	ABAHO	2022-04-19	XE	EPI_ISL_13125385
1049	Alameda	ABAHO	2022-04-19	XE	EPI_ISL_13125386
1058	Los Angeles	Southern CA	2022-04-19	XL	EPI_ISL_13125387
1054	San Diego	Southern CA	2022-04-19	XY	EPI_ISL_13125388
1051	Sonoma	ABAHO	2022-04-19	XE	EPI_ISL_13125389
1052	San Mateo	ABAHO	2022-04-19	XZ	EPI_ISL_13126087
1060	San Mateo	ABAHO	2022-04-19	XZ	EPI_ISL_13126090
1297	San Diego	Southern CA	2022-05-25	XW	EPI_ISL_13146888
1298	San Mateo	ABAHO	2022-05-25	XZ	EPI_ISL_13147323
1248	Los Angeles	Southern CA	2022-05-17	XE	EPI_ISL_13152836
1249	San Francisco	ABAHO	2022-05-17	XE	EPI_ISL_13152871
1250	Contra Costa	ABAHO	2022-05-17	Unclassified	EPI_ISL_13152881
1255	Alameda	ABAHO	2022-05-18	Unclassified	EPI_ISL_13153222
1258	San Diego	Southern CA	2022-05-18	XAG	EPI_ISL_13153242
1241	Unknown	Unknown	2022-05-16	XAC	EPI_ISL_13153405
1214	Los Angeles	Southern CA	2022-05-11	XY	EPI_ISL_13154111
1253	Unknown	Unknown	2022-05-17	XZ	EPI_ISL_13168938
1285	Contra Costa	ABAHO	2022-05-23	XZ	EPI_ISL_13175383
1305	Riverside	Southern CA	2022-05-27	XAC	EPI_ISL_13188249
1310	San Diego	Southern CA	2022-05-28	XE	EPI_ISL_13189182
1226	Unknown	Unknown	2022-05-14	XE	EPI_ISL_13193680
1254	Unknown	ABAHO	2022-05-17	XE	EPI_ISL_13193723
1238	Unknown	Southern CA	2022-05-16	XE	EPI_ISL_13193727
1237	Unknown	Southern CA	2022-05-16	XE	EPI_ISL_13194040
1299	Contra Costa	ABAHO	2022-05-25	XAC	EPI_ISL_13218949
1295	Los Angeles	Southern CA	2022-05-25	XE	EPI_ISL_13218964
1293	Alameda	ABAHO	2022-05-25	XZ	EPI_ISL_13219030
1032	San Diego	Southern CA	2022-04-14	XE	EPI_ISL_13221267
1063	San Luis Obispo	Southern CA	2022-04-21	XE	EPI_ISL_13221628
1003	San Francisco	ABAHO	2022-04-07	XE	EPI_ISL_13222212
1005	San Joaquin	SJVC	2022-04-07	XE	EPI_ISL_13222219
1010	Santa Cruz	ABAHO	2022-04-08	XE	EPI_ISL_13222264
1011	Contra Costa	ABAHO	2022-04-09	XE	EPI_ISL_13222383
1282	Los Angeles	Southern CA	2022-05-23	XM	EPI_ISL_13224608
1294	Los Angeles	Southern CA	2022-05-25	XE	EPI_ISL_13224986
1268	Los Angeles	Southern CA	2022-05-21	XW	EPI_ISL_13225799
1273	Los Angeles	Southern CA	2022-05-22	XAC	EPI_ISL_13226789
1322	San Diego	Southern CA	2022-05-31	Unclassified	EPI_ISL_13258705
1279	San Bernardino	Southern CA	2022-05-22	XL	EPI_ISL_13261662
1274	San Bernardino	Southern CA	2022-05-22	XL	EPI_ISL_13261684
1277	San Bernardino	Southern CA	2022-05-22	XL	EPI_ISL_13261693
1296	Los Angeles	Southern CA	2022-05-25	XW	EPI_ISL_13262470
1325	Unknown	Unknown	2022-06-01	XE	EPI_ISL_13289767
1316	Los Angeles	Southern CA	2022-05-30	Unclassified	EPI_ISL_13291333
1329	Contra Costa	ABAHO	2022-06-02	XE	EPI_ISL_13305366
1289	Los Angeles	Southern CA	2022-05-24	XAG	EPI_ISL_13307652
1290	San Mateo	ABAHO	2022-05-24	Unclassified	EPI_ISL_13307666
1324	Unknown	Southern CA	2022-05-31	XAG	EPI_ISL_13334621
1261	Unknown	Unknown	2022-05-18	XW	EPI_ISL_13334868
1292	Unknown	Southern CA	2022-05-24	XAP	EPI_ISL_13335188
1262	Unknown	Southern CA	2022-05-19	XL	EPI_ISL_13335514
1264	Unknown	Unknown	2022-05-19	XZ	EPI_ISL_13335601
1266	Unknown	Southern CA	2022-05-20	XZ	EPI_ISL_13335814
1242	Unknown	Unknown	2022-05-16	XE	EPI_ISL_13335946
1338	Unknown	Unknown	2022-06-05	XAM	EPI_ISL_13394196
1349	Unknown	SJVC	2022-06-08	XZ	EPI_ISL_13415045
1314	Unknown	Unknown	2022-05-29	XE	EPI_ISL_13416614
1288	Unknown	Southern CA	2022-05-24	XL	EPI_ISL_13416705
1313	Unknown	Unknown	2022-05-29	XE	EPI_ISL_13416768
1317	Unknown	Unknown	2022-05-30	XE	EPI_ISL_13416851
1336	San Diego	Southern CA	2022-06-04	XE	EPI_ISL_13422222
1345	Contra Costa	ABAHO	2022-06-07	XZ	EPI_ISL_13424784
1227	Contra Costa	ABAHO	2022-05-14	XZ	EPI_ISL_13432998
1263	Contra Costa	ABAHO	2022-05-19	XZ	EPI_ISL_13436022
1247	San Francisco	ABAHO	2022-05-16	XZ	EPI_ISL_13456732
1245	Alameda	ABAHO	2022-05-16	XZ	EPI_ISL_13456810
1246	Sonoma	ABAHO	2022-05-16	XZ	EPI_ISL_13456860
1287	Santa Clara	ABAHO	2022-05-23	XAG	EPI_ISL_13456870
1280	Contra Costa	ABAHO	2022-05-23	XAP	EPI_ISL_13456896
1269	San Francisco	ABAHO	2022-05-21	XZ	EPI_ISL_13456931
1271	Santa Clara	ABAHO	2022-05-22	XZ	EPI_ISL_13456946
1350	Los Angeles	Southern CA	2022-06-08	XZ	EPI_ISL_13469191
1354	Los Angeles	Southern CA	2022-06-09	XAN	EPI_ISL_13469553
1344	Orange	Southern CA	2022-06-07	XE	EPI_ISL_13485115
1341	Unknown	Unknown	2022-06-06	XZ	EPI_ISL_13506381
1346	Unknown	Southern CA	2022-06-07	XZ	EPI_ISL_13506807
1347	Unknown	Southern CA	2022-06-07	XZ	EPI_ISL_13506867
1066	El Dorado	Greater Sac	2022-04-22	XE	EPI_ISL_13511391
1088	El Dorado	Greater Sac	2022-04-25	XE	EPI_ISL_13511601
1093	Napa	ABAHO	2022-04-26	XE	EPI_ISL_13511690
1129	Santa Cruz	ABAHO	2022-05-02	Unclassified	EPI_ISL_13511894
1131	Santa Cruz	ABAHO	2022-05-02	Unclassified	EPI_ISL_13511906
1149	Orange	Southern CA	2022-05-03	Unclassified	EPI_ISL_13511937
1110	Yolo	Greater Sac	2022-04-29	XZ	EPI_ISL_13512076
1097	Yolo	Greater Sac	2022-04-26	XZ	EPI_ISL_13512122
1351	San Mateo	ABAHO	2022-06-08	Unclassified	EPI_ISL_13525491
977	Contra Costa	ABAHO	2022-03-30	XE	EPI_ISL_1352623
1122	San Diego	Southern CA	2022-04-30	XE	EPI_ISL_13527328
1166	San Diego	Southern CA	2022-05-06	XE	EPI_ISL_13527346
1128	Humboldt	RANCHO	2022-05-02	XZ	EPI_ISL_135274
1220	San Diego	Southern CA	2022-05-13	XE	EPI_ISL_13528345
1267	San Diego	Southern CA	2022-05-20	XE	EPI_ISL_13529594
1300	San Bernardino	Southern CA	2022-05-26	Unclassified	EPI_ISL_13544519
1304	Los Angeles	Southern CA	2022-05-27	Unclassified	EPI_ISL_13544785
1303	Contra Costa	ABAHO	2022-05-27	XZ	EPI_ISL_13544824
1301	Los Angeles	Southern CA	2022-05-27	Unclassified	EPI_ISL_13544967
1302	Contra Costa	ABAHO	2022-05-27	XZ	EPI_ISL_13545139
1315	Ventura	Southern CA	2022-05-30	XZ	EPI_ISL_13545326
1326	Fresno	SJVC	2022-06-01	Unclassified	EPI_ISL_13545558
1332	Sacramento	Greater Sac	2022-06-02	XE	EPI_ISL_13547508
1330	Contra Costa	ABAHO	2022-06-02	Unclassified	EPI_ISL_13547540
1339	Santa Clara	ABAHO	2022-06-06	XE	EPI_ISL_13548852
1333	San Mateo	ABAHO	2022-06-02	Unclassified	EPI_ISL_13550775
1337	San Bernardino	Southern CA	2022-06-04	XZ	EPI_ISL_13551452
1342	Orange	Southern CA	2022-06-06	Unclassified	EPI_ISL_13552191
1343	Fresno	SJVC	2022-06-06	Unclassified	EPI_ISL_13552393
1357	San Bernardino	Southern CA	2022-06-12	Unclassified	EPI_ISL_13559087
1374	Orange	Southern CA	2022-06-16	Unclassified	EPI_ISL_13581043
1370	Riverside	Southern CA	2022-06-15	Unclassified	EPI_ISL_13583935
1367	Los Angeles	Southern CA	2022-06-15	XAF	EPI_ISL_13583965
1361	Unknown	Unknown	2022-06-13	XAN	EPI_ISL_13586411
1358	Unknown	Unknown	2022-06-12	XE	EPI_ISL_13586600
1359	Unknown	Unknown	2022-06-12	XE	EPI_ISL_13587265
1353	Unknown	Unknown	2022-06-09	XAM	EPI_ISL_13587392
1352	Los Angeles	Southern CA	2022-06-09	XAF	EPI_ISL_13591100
1366	Los Angeles	Southern CA	2022-06-14	XAM	EPI_ISL_13592507
1364	Los Angeles	Southern CA	2022-06-14	Unclassified	EPI_ISL_13642674
1363	Los Angeles	Southern CA	2022-06-14	XE	EPI_ISL_13642677
1230	Los Angeles	Southern CA	2022-05-15	XE	EPI_ISL_13654914
1234	Los Angeles	Southern CA	2022-05-15	XE	EPI_ISL_13654948
1235	Los Angeles	Southern CA	2022-05-16	XZ	EPI_ISL_13654958
1244	Los Angeles	Southern CA	2022-05-16	XE	EPI_ISL_13654966
1386	Unknown	Unknown	2022-06-22	XAV	EPI_ISL_13702250
1362	Unknown	Unknown	2022-06-13	XE	EPI_ISL_13702903
1356	Unknown	Unknown	2022-06-10	XE	EPI_ISL_13703224
1372	San Joaquin	SJVC	2022-06-16	XZ	EPI_ISL_13705293
1379	Los Angeles	Southern CA	2022-06-19	XE	EPI_ISL_13705755
1383	San Bernardino	Southern CA	2022-06-21	Unclassified	EPI_ISL_13706253
1311	San Diego	Southern CA	2022-05-29	XZ	EPI_ISL_13706790
1385	Los Angeles	Southern CA	2022-06-22	XE	EPI_ISL_13707205
1394	Solano	ABAHO	2022-06-27	Unclassified	EPI_ISL_13708397
1396	San Bernardino	Southern CA	2022-06-27	Unclassified	EPI_ISL_13723423
1380	Santa Clara	ABAHO	2022-06-20	XAZ	EPI_ISL_13726665
1381	Santa Clara	ABAHO	2022-06-20	XAZ	EPI_ISL_13726672
1404	Unknown	Greater Sac	2022-07-01	XE	EPI_ISL_13784753
1406	Unknown	Southern CA	2022-07-02	Unclassified	EPI_ISL_13784921
1405	Tulare	SJVC	2022-07-01	XE	EPI_ISL_13810996
1403	San Bernardino	Southern CA	2022-07-01	Unclassified	EPI_ISL_13811168
933	Los Angeles	Southern CA	2022-02-25	Unclassified	EPI_ISL_13816267
1140	San Diego	Southern CA	2022-05-03	Unclassified	EPI_ISL_13817839
1155	Los Angeles	Southern CA	2022-05-05	XZ	EPI_ISL_13818119
1172	San Bernardino	Southern CA	2022-05-07	XE	EPI_ISL_13818281
1164	San Diego	Southern CA	2022-05-06	Unclassified	EPI_ISL_13818295
1377	Unknown	Unknown	2022-06-17	XAF	EPI_ISL_13831314
1382	Unknown	Unknown	2022-06-20	XAJ	EPI_ISL_13831611
1376	Unknown	Southern CA	2022-06-16	XAS	EPI_ISL_13831733
1378	Unknown	Unknown	2022-06-18	Unclassified	EPI_ISL_13831960
1375	Unknown	Unknown	2022-06-16	XE	EPI_ISL_13832163
1209	Santa Clara	ABAHO	2022-05-11	XZ	EPI_ISL_13833854
1124	Fresno	SJVC	2022-04-30	XE	EPI_ISL_13833875
1348	Ventura	Southern CA	2022-06-08	XE	EPI_ISL_13834014
1407	Contra Costa	ABAHO	2022-07-03	Unclassified	EPI_ISL_13849394
1390	Unknown	Unknown	2022-06-23	Unclassified	EPI_ISL_13853279
1392	Yolo	Greater Sac	2022-06-25	XZ	EPI_ISL_13897596
1391	Los Angeles	Southern CA	2022-06-25	XAZ	EPI_ISL_13897783
1398	Los Angeles	Southern CA	2022-06-28	XAS	EPI_ISL_13899107
1412	Riverside	Southern CA	2022-07-05	Unclassified	EPI_ISL_13915771
1421	San Bernardino	Southern CA	2022-07-08	XE	EPI_ISL_13922559
1318	Contra Costa	ABAHO	2022-05-31	XZ	EPI_ISL_13973442
1073	Santa Barbara	Southern CA	2022-04-22	XE	EPI_ISL_1397385
1072	Santa Barbara	Southern CA	2022-04-22	XE	EPI_ISL_1397386
1070	San Diego	Southern CA	2022-04-22	XE	EPI_ISL_1397387
1068	Santa Cruz	ABAHO	2022-04-22	XZ	EPI_ISL_13973892
1067	Alameda	ABAHO	2022-04-22	XZ	EPI_ISL_1397393
1150	Santa Cruz	ABAHO	2022-05-04	Unclassified	EPI_ISL_13974296
1151	San Diego	Southern CA	2022-05-04	Unclassified	EPI_ISL_139745
1147	Riverside	Southern CA	2022-05-03	XZ	EPI_ISL_13974596
1424	Solano	ABAHO	2022-07-10	Unclassified	EPI_ISL_13977191
1423	Los Angeles	Southern CA	2022-07-10	Unclassified	EPI_ISL_13977205
1416	Riverside	Southern CA	2022-07-07	Unclassified	EPI_ISL_13978212
1395	Unknown	Unknown	2022-06-27	XAF	EPI_ISL_13979436
1397	Unknown	Unknown	2022-06-28	XE	EPI_ISL_13980082
1260	Unknown	Unknown	2022-05-18	XE	EPI_ISL_13980736
1422	Los Angeles	Southern CA	2022-07-09	Unclassified	EPI_ISL_13982832
1414	Orange	Southern CA	2022-07-06	Unclassified	EPI_ISL_13985310
1401	Unknown	Unknown	2022-06-30	XAC	EPI_ISL_14058028
1402	Unknown	Unknown	2022-06-30	XE	EPI_ISL_14058679
1408	Unknown	Southern CA	2022-07-04	XAS	EPI_ISL_14059582
1431	Riverside	Southern CA	2022-07-14	Unclassified	EPI_ISL_14106061
1437	Ventura	Southern CA	2022-07-16	XAZ	EPI_ISL_14106719
892	Alameda	ABAHO	2021-12-19	Unclassified	EPI_ISL_14137
1368	Sacramento	Greater Sac	2022-06-15	XAP	EPI_ISL_14150907
1420	Unknown	Unknown	2022-07-08	XAZ	EPI_ISL_14220584
1413	Unknown	Southern CA	2022-07-06	XAZ	EPI_ISL_14220653
1419	Unknown	Southern CA	2022-07-08	XAJ	EPI_ISL_14220751
1428	Unknown	Unknown	2022-07-12	XAZ	EPI_ISL_14220928
1426	Unknown	Southern CA	2022-07-12	Unclassified	EPI_ISL_14221270
1415	Unknown	Unknown	2022-07-07	XAJ	EPI_ISL_14221396
1447	Unknown	ABAHO	2022-07-19	XAZ	EPI_ISL_14222759
1469	Santa Clara	ABAHO	2022-07-26	XAZ	EPI_ISL_14245139
1440	Los Angeles	Southern CA	2022-07-18	Unclassified	EPI_ISL_14263230
1436	Los Angeles	Southern CA	2022-07-16	XAS	EPI_ISL_14268507
1435	Los Angeles	Southern CA	2022-07-15	Unclassified	EPI_ISL_14272539
1427	Los Angeles	Southern CA	2022-07-12	XAS	EPI_ISL_14280204
1464	San Diego	Southern CA	2022-07-25	Unclassified	EPI_ISL_14282678
1458	Monterey	ABAHO	2022-07-21	XAZ	EPI_ISL_14283845
1457	Tulare	SJVC	2022-07-21	Unclassified	EPI_ISL_14284145
1451	Stanislaus	SJVC	2022-07-21	Unclassified	EPI_ISL_14284224
1459	Monterey	ABAHO	2022-07-22	XAZ	EPI_ISL_14284570
1456	Riverside	Southern CA	2022-07-21	Unclassified	EPI_ISL_14330399
1465	Los Angeles	Southern CA	2022-07-25	XAS	EPI_ISL_14338158
1308	Unknown	Unknown	2022-05-27	XZ	EPI_ISL_14339255
1369	Unknown	Unknown	2022-06-15	XE	EPI_ISL_14339505
1365	Unknown	Unknown	2022-06-14	Unclassified	EPI_ISL_14339518
1443	Unknown	Unknown	2022-07-18	XAZ	EPI_ISL_14374392
1454	Unknown	Southern CA	2022-07-21	Unclassified	EPI_ISL_14374836
1441	Unknown	Southern CA	2022-07-18	Unclassified	EPI_ISL_14375397
1442	Unknown	Southern CA	2022-07-18	Unclassified	EPI_ISL_14375451
1444	Unknown	Southern CA	2022-07-18	Unclassified	EPI_ISL_14376966
1446	Unknown	Unknown	2022-07-19	Unclassified	EPI_ISL_14377027
1462	Los Angeles	Southern CA	2022-07-25	XAZ	EPI_ISL_14382932
1470	Los Angeles	Southern CA	2022-07-26	XAS	EPI_ISL_14383559
1471	Los Angeles	Southern CA	2022-07-27	XAZ	EPI_ISL_14383694
1460	Los Angeles	Southern CA	2022-07-24	XAZ	EPI_ISL_14386067
1466	Los Angeles	Southern CA	2022-07-25	XAS	EPI_ISL_14416250
1474	Los Angeles	Southern CA	2022-07-28	XAS	EPI_ISL_14417640
1478	Sonoma	ABAHO	2022-07-31	XAZ	EPI_ISL_14445705
1463	Los Angeles	Southern CA	2022-07-25	Unclassified	EPI_ISL_14446255
1450	Los Angeles	Southern CA	2022-07-21	XAZ	EPI_ISL_14447245
1502	Unknown	Unknown	2022-08-08	Unclassified	EPI_ISL_14465154
1480	Riverside	Southern CA	2022-07-31	Unclassified	EPI_ISL_14476235
1482	Los Angeles	Southern CA	2022-08-01	Unclassified	EPI_ISL_14476417
1479	Los Angeles	Southern CA	2022-07-31	XAS	EPI_ISL_14483593
1476	Los Angeles	Southern CA	2022-07-31	XAS	EPI_ISL_14483610
1481	Fresno	SJVC	2022-07-31	XAZ	EPI_ISL_14483902
1477	Los Angeles	Southern CA	2022-07-31	XAZ	EPI_ISL_14484095
1493	Sacramento	Greater Sac	2022-08-02	Unclassified	EPI_ISL_14501121
1433	Los Angeles	Southern CA	2022-07-14	Unclassified	EPI_ISL_14504352
1432	Los Angeles	Southern CA	2022-07-14	Unclassified	EPI_ISL_14504353
1411	Riverside	Southern CA	2022-07-05	XE	EPI_ISL_1452575
1490	Unknown	Unknown	2022-08-02	Unclassified	EPI_ISL_14529505
1492	Unknown	Unknown	2022-08-02	Unclassified	EPI_ISL_14530713
1448	Unknown	Unknown	2022-07-20	Unclassified	EPI_ISL_14531815
1453	Unknown	Southern CA	2022-07-21	Unclassified	EPI_ISL_14531931
1449	Unknown	Unknown	2022-07-20	Unclassified	EPI_ISL_14532089
1472	Santa Clara	ABAHO	2022-07-27	XAZ	EPI_ISL_14542683
1483	Los Angeles	Southern CA	2022-08-01	XAN	EPI_ISL_14557037
1429	Los Angeles	Southern CA	2022-07-13	Unclassified	EPI_ISL_145572
1488	Los Angeles	Southern CA	2022-08-02	Unclassified	EPI_ISL_14558147
1494	Los Angeles	Southern CA	2022-08-03	XAS	EPI_ISL_14560083
1319	Santa Clara	ABAHO	2022-05-31	XAC	EPI_ISL_1456651
1320	Alameda	ABAHO	2022-05-31	Unclassified	EPI_ISL_1456676
1323	Alameda	ABAHO	2022-05-31	XE	EPI_ISL_1456698
1222	Alameda	ABAHO	2022-05-13	XE	EPI_ISL_14597321
1335	San Mateo	ABAHO	2022-06-03	XAH	EPI_ISL_14610578
1328	Alameda	ABAHO	2022-06-02	XZ	EPI_ISL_14610610
1495	Unknown	Unknown	2022-08-04	XAN	EPI_ISL_14626357
1501	Unknown	Southern CA	2022-08-08	Unclassified	EPI_ISL_14626745
1475	Unknown	Unknown	2022-07-29	Unclassified	EPI_ISL_14626934
1499	Unknown	Unknown	2022-08-07	Unclassified	EPI_ISL_14626988
1485	Unknown	Unknown	2022-08-01	XAN	EPI_ISL_14627774
1486	Unknown	Southern CA	2022-08-01	Unclassified	EPI_ISL_14628434
1484	Unknown	Unknown	2022-08-01	Unclassified	EPI_ISL_14628519
1491	Unknown	Unknown	2022-08-02	Unclassified	EPI_ISL_14628544
1076	Santa Cruz	ABAHO	2022-04-23	XZ	EPI_ISL_146362
1500	Orange	Southern CA	2022-08-07	Unclassified	EPI_ISL_14651990
1505	Los Angeles	Southern CA	2022-08-11	Unclassified	EPI_ISL_14655253
1504	Los Angeles	Southern CA	2022-08-11	XAS	EPI_ISL_14657381
1196	Los Angeles	Southern CA	2022-05-10	XZ	EPI_ISL_14665733
1195	Los Angeles	Southern CA	2022-05-10	XZ	EPI_ISL_14665767
1205	San Joaquin	SJVC	2022-05-11	XAG	EPI_ISL_14665931
1506	San Bernardino	Southern CA	2022-08-11	Unclassified	EPI_ISL_14670500
1099	San Diego	Southern CA	2022-04-26	XAA	EPI_ISL_146749
1098	San Diego	Southern CA	2022-04-26	Unclassified	EPI_ISL_1468
1091	Los Angeles	Southern CA	2022-04-26	XZ	EPI_ISL_146876
1092	Santa Cruz	ABAHO	2022-04-26	XZ	EPI_ISL_146889
1095	Santa Cruz	ABAHO	2022-04-26	Unclassified	EPI_ISL_146932
932	Napa	ABAHO	2022-02-22	Unclassified	EPI_ISL_146991
1508	Los Angeles	Southern CA	2022-08-12	Unclassified	EPI_ISL_14709729
1208	Riverside	Southern CA	2022-05-11	XE	EPI_ISL_14712
1207	Santa Clara	ABAHO	2022-05-11	XZ	EPI_ISL_147149
1509	Los Angeles	Southern CA	2022-08-13	Unclassified	EPI_ISL_14737385
1514	San Bernardino	Southern CA	2022-08-15	Unclassified	EPI_ISL_14738551
1525	Orange	Southern CA	2022-08-20	Unclassified	EPI_ISL_14740968
1510	Los Angeles	Southern CA	2022-08-14	Unclassified	EPI_ISL_14743694
1512	Los Angeles	Southern CA	2022-08-14	XAS	EPI_ISL_14757528
1206	Los Angeles	Southern CA	2022-05-11	XE	EPI_ISL_14773
1517	Madera	SJVC	2022-08-17	Unclassified	EPI_ISL_14777013
1461	Alameda	ABAHO	2022-07-24	Unclassified	EPI_ISL_14790190
1468	Sacramento	Greater Sac	2022-07-26	XAN	EPI_ISL_14790450
1511	Unknown	Unknown	2022-08-14	Unclassified	EPI_ISL_14802752
1507	Unknown	Southern CA	2022-08-11	Unclassified	EPI_ISL_14802882
1487	Fresno	SJVC	2022-08-02	XAS	EPI_ISL_14805447
1489	Fresno	SJVC	2022-08-02	XAS	EPI_ISL_14805486
1497	Fresno	SJVC	2022-08-05	XAS	EPI_ISL_14805593
1496	Monterey	ABAHO	2022-08-04	Unclassified	EPI_ISL_14835883
1526	Orange	Southern CA	2022-08-21	Unclassified	EPI_ISL_14849515
1527	Los Angeles	Southern CA	2022-08-21	Unclassified	EPI_ISL_14849568
1531	Riverside	Southern CA	2022-08-22	Unclassified	EPI_ISL_14850385
1535	San Bernardino	Southern CA	2022-08-24	Unclassified	EPI_ISL_14851784
1529	Los Angeles	Southern CA	2022-08-22	XAZ	EPI_ISL_14867954
1532	Los Angeles	Southern CA	2022-08-23	Unclassified	EPI_ISL_14869060
1001	Los Angeles	Southern CA	2022-04-06	XZ	EPI_ISL_14871933
1522	Sonoma	ABAHO	2022-08-19	XAS	EPI_ISL_14875495
1518	Unknown	Unknown	2022-08-17	Unclassified	EPI_ISL_14901979
1520	Unknown	SJVC	2022-08-18	XAS	EPI_ISL_14902032
1524	Unknown	Southern CA	2022-08-19	Unclassified	EPI_ISL_14902466
1523	Unknown	Southern CA	2022-08-19	Unclassified	EPI_ISL_14902814
1528	Los Angeles	Southern CA	2022-08-22	XAS	EPI_ISL_14904898
1538	Los Angeles	Southern CA	2022-08-27	XAS	EPI_ISL_14906269
1546	Los Angeles	Southern CA	2022-08-30	Unclassified	EPI_ISL_14940588
1550	Orange	Southern CA	2022-08-31	Unclassified	EPI_ISL_14940993
1012	Los Angeles	Southern CA	2022-04-09	XZ	EPI_ISL_14958328
1022	Contra Costa	ABAHO	2022-04-12	XZ	EPI_ISL_14961340
1542	Los Angeles	Southern CA	2022-08-29	XAZ	EPI_ISL_14963127
896	San Francisco	ABAHO	2022-01-06	Unclassified	EPI_ISL_14963844
918	San Francisco	ABAHO	2022-01-06	Unclassified	EPI_ISL_14963879
914	San Francisco	ABAHO	2022-01-06	Unclassified	EPI_ISL_14963967
911	San Francisco	ABAHO	2022-01-06	Unclassified	EPI_ISL_14963988
897	San Francisco	ABAHO	2022-01-06	Unclassified	EPI_ISL_14964
898	San Francisco	ABAHO	2022-01-06	XM	EPI_ISL_14964071
912	San Mateo	ABAHO	2022-01-06	Unclassified	EPI_ISL_149641
903	Alameda	ABAHO	2022-01-06	Unclassified	EPI_ISL_1496411
913	San Francisco	ABAHO	2022-01-06	Unclassified	EPI_ISL_1496421
893	Santa Clara	ABAHO	2022-01-05	Unclassified	EPI_ISL_1496427
908	Alameda	ABAHO	2022-01-06	Unclassified	EPI_ISL_149643
909	San Francisco	ABAHO	2022-01-06	Unclassified	EPI_ISL_1496431
902	San Francisco	ABAHO	2022-01-06	Unclassified	EPI_ISL_1496432
920	San Francisco	ABAHO	2022-01-08	Unclassified	EPI_ISL_1496446
917	San Francisco	ABAHO	2022-01-06	Unclassified	EPI_ISL_1496463
899	San Francisco	ABAHO	2022-01-06	Unclassified	EPI_ISL_149648
916	San Francisco	ABAHO	2022-01-06	Unclassified	EPI_ISL_1496483
895	San Francisco	ABAHO	2022-01-06	Unclassified	EPI_ISL_1496485
906	San Francisco	ABAHO	2022-01-06	Unclassified	EPI_ISL_1496488
915	San Francisco	ABAHO	2022-01-06	Unclassified	EPI_ISL_1496493
1023	Sacramento	Greater Sac	2022-04-12	XZ	EPI_ISL_14983449
1537	San Joaquin	SJVC	2022-08-26	XBG	EPI_ISL_14987385
1013	Orange	Southern CA	2022-04-10	XE	EPI_ISL_15003497
1035	Santa Clara	ABAHO	2022-04-15	XZ	EPI_ISL_15010183
1434	Sonoma	ABAHO	2022-07-15	XAS	EPI_ISL_15029867
1539	Unknown	Unknown	2022-08-27	Unclassified	EPI_ISL_15044678
1410	Unknown	Unknown	2022-07-05	XE	EPI_ISL_15045055
1548	Unknown	Unknown	2022-08-30	XAS	EPI_ISL_15045071
1059	Santa Cruz	ABAHO	2022-04-19	XZ	EPI_ISL_15054047
1553	Los Angeles	Southern CA	2022-09-06	XAS	EPI_ISL_15063034
1540	Contra Costa	ABAHO	2022-08-27	XBB	EPI_ISL_15075814
1541	Unknown	ABAHO	2022-08-27	XBB	EPI_ISL_15075814
1544	Unknown	SJVC	2022-08-29	XBG	EPI_ISL_15077759
1557	Los Angeles	Southern CA	2022-09-11	XAS	EPI_ISL_15098100
1556	Los Angeles	Southern CA	2022-09-07	XAZ	EPI_ISL_15103135
1585	Los Angeles	Southern CA	2022-09-27	Unclassified	EPI_ISL_15103168
1558	San Bernardino	Southern CA	2022-09-12	XBE	EPI_ISL_15104461
1559	San Bernardino	Southern CA	2022-09-12	XAS	EPI_ISL_15113981
1521	San Francisco	ABAHO	2022-08-19	XAS	EPI_ISL_15124050
1530	Contra Costa	ABAHO	2022-08-22	XAS	EPI_ISL_15124161
1515	San Joaquin	SJVC	2022-08-15	XAS	EPI_ISL_15124283
1555	Unknown	Unknown	2022-09-07	Unclassified	EPI_ISL_15163735
1467	Unknown	Unknown	2022-07-25	XAZ	EPI_ISL_15163962
1545	Unknown	Unknown	2022-08-29	XAS	EPI_ISL_15164149
1549	Unknown	RANCHO	2022-08-30	XBG	EPI_ISL_15181375
1400	Unknown	Southern CA	2022-06-30	XE	EPI_ISL_15201999
1202	Unknown	ABAHO	2022-05-10	XZ	EPI_ISL_15224810
1204	Unknown	ABAHO	2022-05-10	XAM	EPI_ISL_15224811
1194	Unknown	SJVC	2022-05-10	XE	EPI_ISL_15224840
1572	Alameda	ABAHO	2022-09-22	XBB	EPI_ISL_15241827
1580	San Mateo	ABAHO	2022-09-26	XBB	EPI_ISL_15254711
1581	San Mateo	ABAHO	2022-09-26	XBB	EPI_ISL_15254711
1567	Unknown	Unknown	2022-09-19	XBC	EPI_ISL_15275374
1562	Unknown	Unknown	2022-09-15	XBC	EPI_ISL_15275406
1566	Unknown	Unknown	2022-09-19	XBC	EPI_ISL_15275421
1563	Sonoma	ABAHO	2022-09-17	XBG	EPI_ISL_15302588
1575	Los Angeles	Southern CA	2022-09-24	XBE	EPI_ISL_15324728
1574	Los Angeles	Southern CA	2022-09-24	XBE	EPI_ISL_15324754
1598	Los Angeles	Southern CA	2022-09-30	XBE	EPI_ISL_15324934
1594	Los Angeles	Southern CA	2022-09-29	XAS	EPI_ISL_15324937
1599	Los Angeles	Southern CA	2022-09-30	XAY.1	EPI_ISL_15324972
1600	Los Angeles	Southern CA	2022-09-30	XAY.1	EPI_ISL_15324975
1564	Sacramento	Greater Sac	2022-09-19	XBG	EPI_ISL_15337102
1312	San Diego	Southern CA	2022-05-29	XZ	EPI_ISL_15338522
1438	San Diego	Southern CA	2022-07-16	XAZ	EPI_ISL_15375596
1409	San Diego	Southern CA	2022-07-05	XAS	EPI_ISL_15376154
1439	San Diego	Southern CA	2022-07-17	XAS	EPI_ISL_15378833
1399	San Diego	Southern CA	2022-06-29	XAS	EPI_ISL_15378921
1569	Santa Clara	ABAHO	2022-09-21	XBE	EPI_ISL_15397737
1607	San Mateo	ABAHO	2022-10-03	XBB	EPI_ISL_15413946
1635	Tulare	SJVC	2022-10-07	XAS	EPI_ISL_15414782
1592	Unknown	Unknown	2022-09-28	XAZ	EPI_ISL_15461886
1561	Unknown	Unknown	2022-09-15	XAZ	EPI_ISL_15461917
1591	Unknown	Unknown	2022-09-28	XAZ	EPI_ISL_15461989
1582	Unknown	Unknown	2022-09-26	XBB	EPI_ISL_15461999
1593	Unknown	Southern CA	2022-09-28	XBB	EPI_ISL_15462272
1430	San Diego	Southern CA	2022-07-13	XAZ	EPI_ISL_15462862
1650	Orange	Southern CA	2022-10-11	XBB	EPI_ISL_15482884
1674	San Mateo	ABAHO	2022-10-16	XAZ	EPI_ISL_15486046
1642	San Mateo	ABAHO	2022-10-09	XBB	EPI_ISL_15486047
1651	Unknown	Unknown	2022-10-11	XBB	EPI_ISL_15502042
1645	Unknown	Unknown	2022-10-10	XBB	EPI_ISL_15509864
1656	Unknown	Unknown	2022-10-12	XBB	EPI_ISL_15509865
1445	San Joaquin	SJVC	2022-07-19	XAS	EPI_ISL_15518025
1455	San Joaquin	SJVC	2022-07-21	XAS	EPI_ISL_15518031
1648	Contra Costa	ABAHO	2022-10-10	Unclassified	EPI_ISL_1553127
1662	San Mateo	ABAHO	2022-10-14	XBB	EPI_ISL_1553241
1615	San Mateo	ABAHO	2022-10-04	XBC	EPI_ISL_1553633
1603	Los Angeles	Southern CA	2022-10-01	XAZ	EPI_ISL_155382
1666	San Diego	Southern CA	2022-10-14	XBB	EPI_ISL_15582817
1665	San Diego	Southern CA	2022-10-14	XBB	EPI_ISL_15582854
1664	Riverside	Southern CA	2022-10-14	XAS	EPI_ISL_15582898
1670	Sacramento	Greater Sac	2022-10-15	Unclassified	EPI_ISL_15583095
1672	Orange	Southern CA	2022-10-16	XBB	EPI_ISL_1558323
1699	San Mateo	ABAHO	2022-10-20	XBB	EPI_ISL_15583385
1682	San Diego	Southern CA	2022-10-17	XBB	EPI_ISL_15583522
1668	Los Angeles	Southern CA	2022-10-15	XBB	EPI_ISL_1558381
1696	Los Angeles	Southern CA	2022-10-19	Unclassified	EPI_ISL_15583976
1516	Yolo	Greater Sac	2022-08-16	XAS	EPI_ISL_15594910
1534	San Luis Obispo	Southern CA	2022-08-24	XAS	EPI_ISL_15596354
1533	San Mateo	ABAHO	2022-08-23	XAS	EPI_ISL_15596467
1560	San Francisco	ABAHO	2022-09-13	XBB	EPI_ISL_15603830
1418	San Francisco	ABAHO	2022-07-08	XAS	EPI_ISL_15624140
1498	San Mateo	ABAHO	2022-08-05	XAZ	EPI_ISL_15624418
1543	Alameda	ABAHO	2022-08-29	XAS	EPI_ISL_15624851
1547	Alameda	ABAHO	2022-08-30	XAZ	EPI_ISL_15624936
1565	Sacramento	Greater Sac	2022-09-19	XBE	EPI_ISL_15625170
1719	San Francisco	ABAHO	2022-10-24	XBB	EPI_ISL_15638642
1716	Los Angeles	Southern CA	2022-10-24	XBB	EPI_ISL_15638674
1551	Santa Clara	ABAHO	2022-09-02	XBB	EPI_ISL_15639
1602	Fresno	SJVC	2022-09-30	XAS	EPI_ISL_156392
1700	San Mateo	ABAHO	2022-10-20	XBB	EPI_ISL_15639479
1573	San Diego	Southern CA	2022-09-22	XAZ	EPI_ISL_1564125
1193	Los Angeles	Southern CA	2022-05-09	XE	EPI_ISL_1564751
1596	San Diego	Southern CA	2022-09-29	XBB	EPI_ISL_156493
1187	San Diego	Southern CA	2022-05-09	XAH	EPI_ISL_156525
1184	Riverside	Southern CA	2022-05-09	Unclassified	EPI_ISL_1565278
1610	San Diego	Southern CA	2022-10-03	XBC	EPI_ISL_1565377
1587	Fresno	SJVC	2022-09-28	XAS	EPI_ISL_1565727
1597	Fresno	SJVC	2022-09-30	XAS	EPI_ISL_1565728
1611	Unknown	Unknown	2022-10-03	XBB	EPI_ISL_15661315
1570	Los Angeles	Southern CA	2022-09-21	XAZ	EPI_ISL_1566436
1687	Santa Clara	ABAHO	2022-10-18	XBB	EPI_ISL_15665102
1628	Santa Clara	ABAHO	2022-10-06	XBG	EPI_ISL_15665208
1644	Santa Clara	ABAHO	2022-10-10	XBG	EPI_ISL_15665247
1652	Santa Clara	ABAHO	2022-10-12	XBB	EPI_ISL_15665277
1661	Contra Costa	ABAHO	2022-10-13	XBB	EPI_ISL_15665562
1583	San Francisco	ABAHO	2022-09-26	XBB	EPI_ISL_15665567
1693	Santa Clara	ABAHO	2022-10-18	XBB	EPI_ISL_15665569
1698	San Francisco	ABAHO	2022-10-19	XBB	EPI_ISL_15665574
1669	Los Angeles	Southern CA	2022-10-15	XBB	EPI_ISL_15665765
1629	Los Angeles	Southern CA	2022-10-07	XBB	EPI_ISL_15665779
1686	Los Angeles	Southern CA	2022-10-18	XBB	EPI_ISL_15665792
1634	San Diego	Southern CA	2022-10-07	XBB	EPI_ISL_1566619
1663	San Joaquin	SJVC	2022-10-14	XBB	EPI_ISL_15666217
1624	Yolo	Greater Sac	2022-10-06	XBB	EPI_ISL_15666486
1552	San Luis Obispo	Southern CA	2022-09-06	XBB	EPI_ISL_1566713
1733	Sonoma	ABAHO	2022-10-27	XBB	EPI_ISL_15667745
1739	Sonoma	ABAHO	2022-10-28	XBE	EPI_ISL_15667762
1711	Unknown	Unknown	2022-10-23	XBB	EPI_ISL_15668596
1605	Ventura	Southern CA	2022-10-02	XBB	EPI_ISL_1567256
1709	Santa Clara	ABAHO	2022-10-22	XBC	EPI_ISL_15704685
1715	Orange	Southern CA	2022-10-24	XBB	EPI_ISL_15704813
1722	Los Angeles	Southern CA	2022-10-25	XBB	EPI_ISL_15705026
1729	Los Angeles	Southern CA	2022-10-26	XBB	EPI_ISL_15707108
1738	Tulare	SJVC	2022-10-27	XBB	EPI_ISL_15707332
1694	Contra Costa	ABAHO	2022-10-18	XBB	EPI_ISL_15709249
1684	Contra Costa	ABAHO	2022-10-18	XBB	EPI_ISL_15709250
1626	Contra Costa	ABAHO	2022-10-06	XBB	EPI_ISL_15710897
1217	San Diego	Southern CA	2022-05-12	XE	EPI_ISL_15721215
1579	San Mateo	ABAHO	2022-09-26	XAS	EPI_ISL_15730675
1554	San Joaquin	SJVC	2022-09-07	XBB	EPI_ISL_1573396
1584	Contra Costa	ABAHO	2022-09-27	XBB	EPI_ISL_15739
1576	Contra Costa	ABAHO	2022-09-25	XBB	EPI_ISL_1573933
1743	Los Angeles	Southern CA	2022-10-29	XBB	EPI_ISL_15744539
1742	Los Angeles	Southern CA	2022-10-29	XBB	EPI_ISL_15744557
1749	Los Angeles	Southern CA	2022-10-30	XBB	EPI_ISL_15744615
1748	Riverside	Southern CA	2022-10-30	XBB	EPI_ISL_15744665
1725	Sonoma	ABAHO	2022-10-25	XBB	EPI_ISL_15756395
1827	Sonoma	ABAHO	2022-11-05	Unclassified	EPI_ISL_15756409
1747	Los Angeles	Southern CA	2022-10-30	XBC	EPI_ISL_15766199
1751	Orange	Southern CA	2022-10-31	XBB	EPI_ISL_15766671
1750	Los Angeles	Southern CA	2022-10-31	XBB	EPI_ISL_15766731
1765	Los Angeles	Southern CA	2022-10-31	XBB	EPI_ISL_15766787
1766	Solano	ABAHO	2022-10-31	XBB	EPI_ISL_15766797
1754	Los Angeles	Southern CA	2022-10-31	XBB	EPI_ISL_15766897
1773	Contra Costa	ABAHO	2022-11-01	XBB	EPI_ISL_15767104
1647	Unknown	Unknown	2022-10-10	XBB	EPI_ISL_15769113
1639	Unknown	Unknown	2022-10-08	XBB	EPI_ISL_15769141
1646	Unknown	Unknown	2022-10-10	XBB	EPI_ISL_15769248
1690	Unknown	Unknown	2022-10-18	XBB	EPI_ISL_15769349
1676	Unknown	Unknown	2022-10-16	XBE	EPI_ISL_15769400
1675	Unknown	Unknown	2022-10-16	XBB	EPI_ISL_15769417
1691	Unknown	Unknown	2022-10-18	XBB	EPI_ISL_15769429
1692	Unknown	Unknown	2022-10-18	XBB	EPI_ISL_15769441
1775	Unknown	Unknown	2022-11-01	XBB	EPI_ISL_15772941
1829	Unknown	Unknown	2022-11-05	XBB	EPI_ISL_15772952
1746	Santa Clara	ABAHO	2022-10-29	XBD	EPI_ISL_1577818
1780	Orange	Southern CA	2022-11-02	XBB	EPI_ISL_15778990
1818	Contra Costa	ABAHO	2022-11-04	XBB	EPI_ISL_15779882
1817	Orange	Southern CA	2022-11-04	XBB	EPI_ISL_15779898
1577	Los Angeles	Southern CA	2022-09-25	XBB	EPI_ISL_15792700
1571	San Diego	Southern CA	2022-09-21	XBB	EPI_ISL_15792964
1200	Los Angeles	Southern CA	2022-05-10	XE	EPI_ISL_15796620
68	San Bernardino	Southern CA	2021-03-27	XB	EPI_ISL_1581817
69	Unknown	Unknown	2021-03-27	XB	EPI_ISL_1581817
1713	Contra Costa	ABAHO	2022-10-23	XBB	EPI_ISL_15818515
1701	Los Angeles	Southern CA	2022-10-20	XBE	EPI_ISL_15818522
1782	San Francisco	ABAHO	2022-11-02	XBB	EPI_ISL_15818536
1783	Los Angeles	Southern CA	2022-11-02	XBB	EPI_ISL_15818547
1712	Alameda	ABAHO	2022-10-23	XBB	EPI_ISL_1581859
1721	Ventura	Southern CA	2022-10-24	XBE	EPI_ISL_15818627
1767	San Francisco	ABAHO	2022-10-31	XBB	EPI_ISL_15818655
1794	Alameda	ABAHO	2022-11-02	XBB	EPI_ISL_15818671
1779	Alameda	ABAHO	2022-11-01	XBB	EPI_ISL_15818678
1714	San Benito	SJVC	2022-10-23	XBB	EPI_ISL_1581868
1726	Los Angeles	Southern CA	2022-10-25	XBB	EPI_ISL_15818821
1723	Los Angeles	Southern CA	2022-10-25	XBB	EPI_ISL_1581897
1793	Solano	ABAHO	2022-11-02	XBB	EPI_ISL_15818986
1734	San Diego	Southern CA	2022-10-27	XBB	EPI_ISL_158191
1705	Contra Costa	ABAHO	2022-10-22	XBB	EPI_ISL_15819311
1768	Merced	SJVC	2022-10-31	XBB	EPI_ISL_1581943
1772	Sutter	Greater Sac	2022-11-01	XBB	EPI_ISL_15819433
1785	Los Angeles	Southern CA	2022-11-02	XBB	EPI_ISL_15819435
1795	Placer	Greater Sac	2022-11-02	XBB	EPI_ISL_15819484
1689	San Diego	Southern CA	2022-10-18	XBB	EPI_ISL_15819582
1595	San Diego	Southern CA	2022-09-29	Unclassified	EPI_ISL_15819589
1758	Los Angeles	Southern CA	2022-10-31	XBB	EPI_ISL_1581959
1741	San Diego	Southern CA	2022-10-28	XBE	EPI_ISL_1581997
1619	Ventura	Southern CA	2022-10-05	XBC	EPI_ISL_15824732
1796	Merced	SJVC	2022-11-02	XBC	EPI_ISL_15824742
1801	Sonoma	ABAHO	2022-11-03	XBB	EPI_ISL_15840549
1819	Los Angeles	Southern CA	2022-11-04	XBB	EPI_ISL_15840601
1812	Los Angeles	Southern CA	2022-11-04	XBC	EPI_ISL_15840610
1813	Santa Clara	ABAHO	2022-11-04	XBB	EPI_ISL_15840657
1826	Los Angeles	Southern CA	2022-11-05	XBB	EPI_ISL_15840817
1836	San Diego	Southern CA	2022-11-06	XBB	EPI_ISL_15841072
1834	Los Angeles	Southern CA	2022-11-06	XBB	EPI_ISL_15841101
1833	Los Angeles	Southern CA	2022-11-06	XBB	EPI_ISL_15841102
1832	Los Angeles	Southern CA	2022-11-06	XBB	EPI_ISL_15841114
1846	Los Angeles	Southern CA	2022-11-07	XBB	EPI_ISL_15841295
1857	Imperial	Southern CA	2022-11-07	XBC	EPI_ISL_15841303
1853	San Bernardino	Southern CA	2022-11-07	XBB	EPI_ISL_15841349
1844	Los Angeles	Southern CA	2022-11-07	XBB	EPI_ISL_15841379
1848	Los Angeles	Southern CA	2022-11-07	XBB	EPI_ISL_15841402
1877	Los Angeles	Southern CA	2022-11-08	XBB	EPI_ISL_15841470
1866	Orange	Southern CA	2022-11-08	XBD	EPI_ISL_15841529
1886	Los Angeles	Southern CA	2022-11-09	XBB	EPI_ISL_15841671
1770	Los Angeles	Southern CA	2022-11-01	XBB	EPI_ISL_158419
1769	Los Angeles	Southern CA	2022-11-01	XBB	EPI_ISL_1584252
1717	Unknown	Southern CA	2022-10-24	XBB	EPI_ISL_15842878
1720	Unknown	Southern CA	2022-10-24	XBB	EPI_ISL_15842922
1728	Unknown	Unknown	2022-10-25	XBB	EPI_ISL_15842963
1731	Unknown	Southern CA	2022-10-26	XBB	EPI_ISL_15842980
1724	Unknown	Southern CA	2022-10-25	XBB	EPI_ISL_15843071
1791	Los Angeles	Southern CA	2022-11-02	XBB	EPI_ISL_1584536
1792	San Francisco	ABAHO	2022-11-02	XBB	EPI_ISL_1584794
1307	San Diego	Southern CA	2022-05-27	XE	EPI_ISL_15848046
1800	Los Angeles	Southern CA	2022-11-03	XBB	EPI_ISL_1584871
1802	Orange	Southern CA	2022-11-03	XBB	EPI_ISL_1584941
1803	Los Angeles	Southern CA	2022-11-03	XBB	EPI_ISL_1584983
1840	Los Angeles	Southern CA	2022-11-06	XBB	EPI_ISL_15859898
1849	San Diego	Southern CA	2022-11-07	XBB	EPI_ISL_15860088
1847	Los Angeles	Southern CA	2022-11-07	XBB	EPI_ISL_15860090
1864	San Mateo	ABAHO	2022-11-08	XBB	EPI_ISL_15860153
1860	Los Angeles	Southern CA	2022-11-08	XBB	EPI_ISL_15860168
1863	Los Angeles	Southern CA	2022-11-08	XBB	EPI_ISL_15860174
1865	Riverside	Southern CA	2022-11-08	XBB	EPI_ISL_15860204
1858	San Bernardino	Southern CA	2022-11-08	XBB	EPI_ISL_15860254
1875	Imperial	Southern CA	2022-11-08	XBB	EPI_ISL_15860278
1882	Los Angeles	Southern CA	2022-11-09	XBB	EPI_ISL_15860319
1892	Imperial	Southern CA	2022-11-09	XBB	EPI_ISL_15860333
1893	Imperial	Southern CA	2022-11-09	XBB	EPI_ISL_15860334
1891	Imperial	Southern CA	2022-11-09	XBB	EPI_ISL_15860344
1880	Los Angeles	Southern CA	2022-11-09	XBB	EPI_ISL_15860353
1578	Unknown	ABAHO	2022-09-26	XBB	EPI_ISL_15877992
1837	Los Angeles	Southern CA	2022-11-06	XBB	EPI_ISL_15880947
1888	Los Angeles	Southern CA	2022-11-09	XBB	EPI_ISL_15880955
1894	Ventura	Southern CA	2022-11-09	XBB	EPI_ISL_15880993
1811	San Francisco	ABAHO	2022-11-03	XBB	EPI_ISL_15881001
1885	Alameda	ABAHO	2022-11-09	XBB	EPI_ISL_15881008
1962	Marin	ABAHO	2022-11-12	XBB	EPI_ISL_15881019
1943	Marin	ABAHO	2022-11-12	XBB	EPI_ISL_15881020
1881	Los Angeles	Southern CA	2022-11-09	XBB	EPI_ISL_15881075
1821	San Bernardino	Southern CA	2022-11-04	XBB	EPI_ISL_15881155
1845	Alameda	ABAHO	2022-11-07	XBB	EPI_ISL_15881168
1841	Imperial	Southern CA	2022-11-06	XBB	EPI_ISL_15881280
1854	Imperial	Southern CA	2022-11-07	XBB	EPI_ISL_15881282
1878	Imperial	Southern CA	2022-11-08	XBB	EPI_ISL_15881283
1876	Imperial	Southern CA	2022-11-08	XBB	EPI_ISL_15881284
1856	Imperial	Southern CA	2022-11-07	XBB	EPI_ISL_15881285
1842	Imperial	Southern CA	2022-11-06	XBB	EPI_ISL_15881288
1806	San Diego	Southern CA	2022-11-03	XBB	EPI_ISL_15881296
1843	Contra Costa	ABAHO	2022-11-06	XBB	EPI_ISL_15881317
1859	Los Angeles	Southern CA	2022-11-08	XBB	EPI_ISL_15881373
1936	Imperial	Southern CA	2022-11-11	XBB	EPI_ISL_15881418
1937	Imperial	Southern CA	2022-11-11	XBB	EPI_ISL_15881419
1924	San Diego	Southern CA	2022-11-11	XBB	EPI_ISL_15881441
1925	San Diego	Southern CA	2022-11-11	XBB	EPI_ISL_15881442
1926	San Diego	Southern CA	2022-11-11	XBB	EPI_ISL_15881445
1927	San Diego	Southern CA	2022-11-11	XBB	EPI_ISL_15881446
1822	San Diego	Southern CA	2022-11-04	XBB	EPI_ISL_15881494
1862	Orange	Southern CA	2022-11-08	Unclassified	EPI_ISL_15890091
1912	Imperial	Southern CA	2022-11-10	XBB	EPI_ISL_15890458
1918	Santa Clara	ABAHO	2022-11-11	XBB	EPI_ISL_15890564
1916	Los Angeles	Southern CA	2022-11-11	XBB	EPI_ISL_15890573
1917	Contra Costa	ABAHO	2022-11-11	XBB	EPI_ISL_15890583
1942	Orange	Southern CA	2022-11-12	XBB	EPI_ISL_15890615
1944	Los Angeles	Southern CA	2022-11-12	XBB	EPI_ISL_15890616
1947	Los Angeles	Southern CA	2022-11-12	XBB	EPI_ISL_15890646
1966	Los Angeles	Southern CA	2022-11-13	XBB	EPI_ISL_15890664
1920	Sonoma	ABAHO	2022-11-11	XBB	EPI_ISL_15921133
1861	Imperial	Southern CA	2022-11-08	XBC	EPI_ISL_1594357
1883	Los Angeles	Southern CA	2022-11-09	XBB	EPI_ISL_15943999
1879	Los Angeles	Southern CA	2022-11-09	XBB	EPI_ISL_15944077
1887	San Diego	Southern CA	2022-11-09	XBB	EPI_ISL_15944089
1895	Los Angeles	Southern CA	2022-11-10	XBB	EPI_ISL_15944177
1896	Orange	Southern CA	2022-11-10	XBB	EPI_ISL_15944332
1898	Los Angeles	Southern CA	2022-11-10	XBB	EPI_ISL_15944440
1911	Los Angeles	Southern CA	2022-11-10	XBB	EPI_ISL_15944442
1919	Santa Clara	ABAHO	2022-11-11	XBB	EPI_ISL_15944528
1915	Los Angeles	Southern CA	2022-11-11	XBB	EPI_ISL_15944565
1938	San Bernardino	Southern CA	2022-11-11	XBB	EPI_ISL_15944701
1914	Los Angeles	Southern CA	2022-11-11	XBB	EPI_ISL_15944760
1934	Orange	Southern CA	2022-11-11	XBB	EPI_ISL_15944789
1923	San Diego	Southern CA	2022-11-11	XBB	EPI_ISL_15944807
1957	Riverside	Southern CA	2022-11-12	XBB	EPI_ISL_15944848
1953	San Diego	Southern CA	2022-11-12	XBB	EPI_ISL_15944917
1959	San Francisco	ABAHO	2022-11-12	Unclassified	EPI_ISL_15944918
1946	Riverside	Southern CA	2022-11-12	Unclassified	EPI_ISL_15944924
1958	Ventura	Southern CA	2022-11-12	XBB	EPI_ISL_15944933
1945	Los Angeles	Southern CA	2022-11-12	XBB	EPI_ISL_15944971
1941	Los Angeles	Southern CA	2022-11-12	XBB	EPI_ISL_15944997
1948	Los Angeles	Southern CA	2022-11-12	XBB	EPI_ISL_15944999
1980	Los Angeles	Southern CA	2022-11-13	XBB	EPI_ISL_15945186
1967	Los Angeles	Southern CA	2022-11-13	XBB	EPI_ISL_15945210
1992	Los Angeles	Southern CA	2022-11-14	XBB	EPI_ISL_15945384
1995	Los Angeles	Southern CA	2022-11-14	XBB	EPI_ISL_15945462
1991	Los Angeles	Southern CA	2022-11-14	XBB	EPI_ISL_15945574
2012	Riverside	Southern CA	2022-11-14	XBB	EPI_ISL_15945603
2051	Solano	ABAHO	2022-11-15	XBB	EPI_ISL_15945686
2028	Los Angeles	Southern CA	2022-11-15	XBB	EPI_ISL_15945727
2073	Los Angeles	Southern CA	2022-11-16	XBB	EPI_ISL_15945961
2079	Los Angeles	Southern CA	2022-11-16	XBB	EPI_ISL_15945963
2097	Los Angeles	Southern CA	2022-11-16	XBB	EPI_ISL_15946029
2099	Kern	SJVC	2022-11-16	XBB	EPI_ISL_15946085
2013	Ventura	Southern CA	2022-11-14	XBB	EPI_ISL_15946527
2081	Los Angeles	Southern CA	2022-11-16	XBB	EPI_ISL_15947081
2083	San Joaquin	SJVC	2022-11-16	XBB	EPI_ISL_15947104
2078	Los Angeles	Southern CA	2022-11-16	XBB	EPI_ISL_15947120
2075	Los Angeles	Southern CA	2022-11-16	XBB	EPI_ISL_15947121
2076	Los Angeles	Southern CA	2022-11-16	XBB	EPI_ISL_15947122
2085	Los Angeles	Southern CA	2022-11-16	XBB	EPI_ISL_15947146
2098	Riverside	Southern CA	2022-11-16	XBB	EPI_ISL_15947150
2106	Los Angeles	Southern CA	2022-11-17	XBB	EPI_ISL_15947276
1963	Solano	ABAHO	2022-11-12	XBE	EPI_ISL_15951329
1871	Unknown	Unknown	2022-11-08	XBB	EPI_ISL_15951919
1838	Unknown	Unknown	2022-11-06	XBB	EPI_ISL_15951940
1778	Unknown	Unknown	2022-11-01	XBB	EPI_ISL_15952046
1870	Unknown	Unknown	2022-11-08	XBB	EPI_ISL_15952067
1788	Unknown	Unknown	2022-11-02	XBB	EPI_ISL_15952084
1764	Unknown	Unknown	2022-10-31	XBE	EPI_ISL_15952113
1735	Unknown	Unknown	2022-10-27	XBB	EPI_ISL_15952200
1730	Unknown	Unknown	2022-10-26	XBB	EPI_ISL_15952239
1776	Unknown	Unknown	2022-11-01	XBB	EPI_ISL_15952244
1777	Unknown	Unknown	2022-11-01	XBB	EPI_ISL_15952247
1760	Unknown	Unknown	2022-10-31	XBB	EPI_ISL_15952291
1736	Unknown	Unknown	2022-10-27	XBB	EPI_ISL_15952375
1727	Unknown	Unknown	2022-10-25	XBB	EPI_ISL_15952457
1774	Unknown	Unknown	2022-11-01	XAV	EPI_ISL_15952489
1790	Unknown	Unknown	2022-11-02	XBD	EPI_ISL_15952691
1762	Unknown	Unknown	2022-10-31	XBB	EPI_ISL_15952768
1759	Unknown	Unknown	2022-10-31	XBB	EPI_ISL_15952795
1752	Contra Costa	ABAHO	2022-10-31	XBB	EPI_ISL_15967748
2082	Merced	SJVC	2022-11-16	XBB	EPI_ISL_15975887
2145	Contra Costa	ABAHO	2022-11-17	XBB	EPI_ISL_15976224
2148	Los Angeles	Southern CA	2022-11-18	XBB	EPI_ISL_15976278
2215	Los Angeles	Southern CA	2022-11-21	XBB	EPI_ISL_15976537
2214	Los Angeles	Southern CA	2022-11-21	XBB	EPI_ISL_15976538
2251	Riverside	Southern CA	2022-11-21	XBB	EPI_ISL_15976557
2217	Los Angeles	Southern CA	2022-11-21	XBE	EPI_ISL_15976579
2218	Los Angeles	Southern CA	2022-11-21	XBE	EPI_ISL_1597659
2239	Los Angeles	Southern CA	2022-11-21	XBE	EPI_ISL_15976591
2212	Placer	Greater Sac	2022-11-21	XBB	EPI_ISL_15976592
2253	Sacramento	Greater Sac	2022-11-21	XBB	EPI_ISL_15976616
2222	Orange	Southern CA	2022-11-21	XBB	EPI_ISL_15976634
2229	Los Angeles	Southern CA	2022-11-21	XBB	EPI_ISL_15976640
2252	Orange	Southern CA	2022-11-21	XBB	EPI_ISL_15976650
1655	San Diego	Southern CA	2022-10-12	XBC	EPI_ISL_15996776
1688	San Diego	Southern CA	2022-10-18	XBB	EPI_ISL_15996804
1697	San Diego	Southern CA	2022-10-19	XBB	EPI_ISL_15996807
1740	San Diego	Southern CA	2022-10-28	XBB	EPI_ISL_15997083
2090	Unknown	Unknown	2022-11-16	XBB	EPI_ISL_15998037
2001	Unknown	Unknown	2022-11-14	XBB	EPI_ISL_15998042
1930	Unknown	Unknown	2022-11-11	XBB	EPI_ISL_15998052
2119	Unknown	Unknown	2022-11-17	XBB	EPI_ISL_15998078
2190	Unknown	Unknown	2022-11-19	XBB	EPI_ISL_16003552
2080	Los Angeles	Southern CA	2022-11-16	XBB	EPI_ISL_16009076
2072	Los Angeles	Southern CA	2022-11-16	XBB	EPI_ISL_16009154
2077	Los Angeles	Southern CA	2022-11-16	XBB	EPI_ISL_16009162
2108	Los Angeles	Southern CA	2022-11-17	XBB	EPI_ISL_16009323
2128	Orange	Southern CA	2022-11-17	XBB	EPI_ISL_16009511
2112	San Diego	Southern CA	2022-11-17	XBB	EPI_ISL_16009564
2110	Los Angeles	Southern CA	2022-11-17	XBJ	EPI_ISL_16009589
2113	San Diego	Southern CA	2022-11-17	XBB	EPI_ISL_16009628
2111	Orange	Southern CA	2022-11-17	XBJ	EPI_ISL_16009639
2107	Los Angeles	Southern CA	2022-11-17	XBB	EPI_ISL_16009654
2109	Orange	Southern CA	2022-11-17	XBB	EPI_ISL_16009656
2156	Los Angeles	Southern CA	2022-11-18	XBB	EPI_ISL_16009704
2153	Los Angeles	Southern CA	2022-11-18	XBB	EPI_ISL_16009714
2195	Los Angeles	Southern CA	2022-11-20	XBB	EPI_ISL_16011809
2219	Orange	Southern CA	2022-11-21	XBB	EPI_ISL_16011943
2221	Los Angeles	Southern CA	2022-11-21	XBB	EPI_ISL_16011983
2226	Los Angeles	Southern CA	2022-11-21	XBB	EPI_ISL_16011986
2250	Los Angeles	Southern CA	2022-11-21	XBB	EPI_ISL_16012037
2216	Los Angeles	Southern CA	2022-11-21	XBB	EPI_ISL_16012058
2220	Riverside	Southern CA	2022-11-21	XBB	EPI_ISL_16012066
2213	Los Angeles	Southern CA	2022-11-21	XBB	EPI_ISL_16012070
2227	Los Angeles	Southern CA	2022-11-21	XBB	EPI_ISL_16012156
2272	Orange	Southern CA	2022-11-22	XBB	EPI_ISL_16012270
2255	Los Angeles	Southern CA	2022-11-22	XBB	EPI_ISL_16012297
2266	Los Angeles	Southern CA	2022-11-22	XBB	EPI_ISL_16012332
2277	San Mateo	ABAHO	2022-11-22	XBB	EPI_ISL_16012646
2305	San Mateo	ABAHO	2022-11-23	XBB	EPI_ISL_16012649
2306	San Mateo	ABAHO	2022-11-23	XBB	EPI_ISL_16012668
1931	Unknown	Unknown	2022-11-11	XBB	EPI_ISL_16016187
1956	Unknown	Unknown	2022-11-12	XBB	EPI_ISL_16016189
2424	Unknown	Unknown	2022-11-26	XBC	EPI_ISL_16016212
2479	Unknown	Unknown	2022-11-27	XBF	EPI_ISL_16016214
1718	Unknown	Unknown	2022-10-24	XBB	EPI_ISL_16035052
2005	Unknown	Unknown	2022-11-14	XBB	EPI_ISL_16035758
2050	Unknown	Greater Sac	2022-11-15	XBB	EPI_ISL_16035813
2041	Unknown	Unknown	2022-11-15	XBB	EPI_ISL_16035845
1761	Unknown	Unknown	2022-10-31	XBB	EPI_ISL_16035890
2049	Unknown	Unknown	2022-11-15	XBB	EPI_ISL_16035904
2048	Unknown	Unknown	2022-11-15	XBB	EPI_ISL_16035918
2003	Unknown	Unknown	2022-11-14	XBB	EPI_ISL_16035921
2002	Unknown	Unknown	2022-11-14	XBB	EPI_ISL_16035955
1907	Unknown	Unknown	2022-11-10	XBB	EPI_ISL_16036029
1932	Unknown	Unknown	2022-11-11	XBB	EPI_ISL_16036119
1908	Unknown	Unknown	2022-11-10	XBB	EPI_ISL_16036160
1851	Unknown	Unknown	2022-11-07	XBB	EPI_ISL_16036204
1975	Unknown	Unknown	2022-11-13	XBB	EPI_ISL_16036205
1976	Unknown	Unknown	2022-11-13	XBB	EPI_ISL_16036215
2008	Unknown	Unknown	2022-11-14	XBB	EPI_ISL_16036296
1852	Unknown	Unknown	2022-11-07	XBB	EPI_ISL_16036428
1839	Unknown	Unknown	2022-11-06	XBJ	EPI_ISL_16036445
1872	Unknown	Unknown	2022-11-08	XBB	EPI_ISL_16036459
2270	Orange	Southern CA	2022-11-22	XBB	EPI_ISL_16037155
2278	Orange	Southern CA	2022-11-22	XBB	EPI_ISL_16037160
2363	Orange	Southern CA	2022-11-25	XBB	EPI_ISL_16037182
2146	Los Angeles	Southern CA	2022-11-18	XBB	EPI_ISL_16047355
2149	Los Angeles	Southern CA	2022-11-18	XBB	EPI_ISL_16047365
2152	Contra Costa	ABAHO	2022-11-18	XBB	EPI_ISL_16047371
2180	Santa Clara	ABAHO	2022-11-19	XBB	EPI_ISL_16047426
2208	Orange	Southern CA	2022-11-20	XBB	EPI_ISL_16047440
2288	Los Angeles	Southern CA	2022-11-22	XBB	EPI_ISL_16047587
2267	Orange	Southern CA	2022-11-22	XBB	EPI_ISL_16047605
2276	Los Angeles	Southern CA	2022-11-22	XBB	EPI_ISL_16047639
2259	Riverside	Southern CA	2022-11-22	XBB	EPI_ISL_16047641
2269	Placer	Greater Sac	2022-11-22	XBB	EPI_ISL_16047759
2271	Sacramento	Greater Sac	2022-11-22	XBB	EPI_ISL_16048859
2321	Riverside	Southern CA	2022-11-23	XBB	EPI_ISL_16048895
2296	Los Angeles	Southern CA	2022-11-23	XBB	EPI_ISL_16048972
2320	Riverside	Southern CA	2022-11-23	XBB	EPI_ISL_16048981
2295	Los Angeles	Southern CA	2022-11-23	XBB	EPI_ISL_16048982
2308	San Diego	Southern CA	2022-11-23	XBB	EPI_ISL_16048989
2300	Orange	Southern CA	2022-11-23	XBB	EPI_ISL_16048999
2309	San Diego	Southern CA	2022-11-23	XBB	EPI_ISL_16049028
2365	Los Angeles	Southern CA	2022-11-25	XBB	EPI_ISL_16049072
2357	Los Angeles	Southern CA	2022-11-25	XBB	EPI_ISL_16049081
2358	Los Angeles	Southern CA	2022-11-25	XBB	EPI_ISL_16049107
2392	Orange	Southern CA	2022-11-25	XBB	EPI_ISL_16049147
2393	Orange	Southern CA	2022-11-25	XBB	EPI_ISL_16049172
2407	Los Angeles	Southern CA	2022-11-26	XBB	EPI_ISL_16049213
2409	Los Angeles	Southern CA	2022-11-26	XBB	EPI_ISL_16049217
1816	Unknown	Greater Sac	2022-11-04	XBB	EPI_ISL_16068544
1831	Unknown	ABAHO	2022-11-05	XBB	EPI_ISL_16068545
1929	Unknown	Unknown	2022-11-11	XBB	EPI_ISL_16069214
1933	Unknown	ABAHO	2022-11-11	XBB	EPI_ISL_16069246
2170	Unknown	Unknown	2022-11-18	XBE	EPI_ISL_16069915
2010	Unknown	ABAHO	2022-11-14	XBB	EPI_ISL_16069997
2011	Unknown	ABAHO	2022-11-14	XBB	EPI_ISL_16070017
1955	Unknown	Unknown	2022-11-12	XBB	EPI_ISL_16070111
1981	Unknown	ABAHO	2022-11-13	XBB	EPI_ISL_16072252
1973	Unknown	Unknown	2022-11-13	XBB	EPI_ISL_16072296
1974	Unknown	Unknown	2022-11-13	XBB	EPI_ISL_16072297
2273	Solano	ABAHO	2022-11-22	XBB	EPI_ISL_16080693
2264	Los Angeles	Southern CA	2022-11-22	XBB	EPI_ISL_16080752
2258	Los Angeles	Southern CA	2022-11-22	XBB	EPI_ISL_16080756
2265	Los Angeles	Southern CA	2022-11-22	XBB	EPI_ISL_16080781
2256	Los Angeles	Southern CA	2022-11-22	XBB	EPI_ISL_16080841
2257	Los Angeles	Southern CA	2022-11-22	XBB	EPI_ISL_16080869
2319	Riverside	Southern CA	2022-11-23	XBB	EPI_ISL_16080873
2303	Los Angeles	Southern CA	2022-11-23	XBB	EPI_ISL_16080883
2316	Los Angeles	Southern CA	2022-11-23	XBB	EPI_ISL_16080913
2299	Orange	Southern CA	2022-11-23	XBB	EPI_ISL_16080941
2294	Los Angeles	Southern CA	2022-11-23	XBB	EPI_ISL_16080962
2293	Los Angeles	Southern CA	2022-11-23	XBB	EPI_ISL_16080984
2318	Orange	Southern CA	2022-11-23	XBB	EPI_ISL_16081060
2335	San Joaquin	SJVC	2022-11-24	XBB	EPI_ISL_16081189
2390	Los Angeles	Southern CA	2022-11-25	XBB	EPI_ISL_16081213
2366	Santa Clara	ABAHO	2022-11-25	XBB	EPI_ISL_16081222
2356	Los Angeles	Southern CA	2022-11-25	XBB	EPI_ISL_16081226
2373	Los Angeles	Southern CA	2022-11-25	XBB	EPI_ISL_16081235
2378	San Diego	Southern CA	2022-11-25	XBB	EPI_ISL_16081266
2362	Los Angeles	Southern CA	2022-11-25	XBB	EPI_ISL_16081324
2367	Riverside	Southern CA	2022-11-25	XBB	EPI_ISL_16081360
2376	San Diego	Southern CA	2022-11-25	XBB	EPI_ISL_16081494
2370	Los Angeles	Southern CA	2022-11-25	XBB	EPI_ISL_16081522
2359	Los Angeles	Southern CA	2022-11-25	XBB	EPI_ISL_16081549
2360	Los Angeles	Southern CA	2022-11-25	XBB	EPI_ISL_16081558
2361	Los Angeles	Southern CA	2022-11-25	XBB	EPI_ISL_16081566
2364	Los Angeles	Southern CA	2022-11-25	XBB	EPI_ISL_16081597
2377	Los Angeles	Southern CA	2022-11-25	XBB	EPI_ISL_16081652
2425	Los Angeles	Southern CA	2022-11-26	XBB	EPI_ISL_16081673
2399	Los Angeles	Southern CA	2022-11-26	XBB	EPI_ISL_16081711
2411	San Diego	Southern CA	2022-11-26	XBB	EPI_ISL_16081733
2404	Los Angeles	Southern CA	2022-11-26	XBB	EPI_ISL_16081747
2405	Los Angeles	Southern CA	2022-11-26	XBB	EPI_ISL_16081753
2400	Los Angeles	Southern CA	2022-11-26	XBB	EPI_ISL_16081760
2401	San Bernardino	Southern CA	2022-11-26	XBB	EPI_ISL_16081837
2426	Los Angeles	Southern CA	2022-11-26	XBB	EPI_ISL_16081846
2403	Riverside	Southern CA	2022-11-26	XBB	EPI_ISL_16081870
2427	Los Angeles	Southern CA	2022-11-26	XBB	EPI_ISL_16081905
2441	Los Angeles	Southern CA	2022-11-27	XBB	EPI_ISL_16082023
2485	Ventura	Southern CA	2022-11-27	XBB	EPI_ISL_16082154
2435	Orange	Southern CA	2022-11-27	XBB	EPI_ISL_16082159
2483	San Bernardino	Southern CA	2022-11-27	XBB	EPI_ISL_16082168
2432	Los Angeles	Southern CA	2022-11-27	XBB	EPI_ISL_16082189
2445	Orange	Southern CA	2022-11-27	XBB	EPI_ISL_16082276
2449	San Diego	Southern CA	2022-11-27	XBB	EPI_ISL_16082292
2484	Orange	Southern CA	2022-11-27	XBB	EPI_ISL_16082297
2431	Los Angeles	Southern CA	2022-11-27	XBB	EPI_ISL_16082311
2429	Los Angeles	Southern CA	2022-11-27	XBB	EPI_ISL_16082335
2450	San Diego	Southern CA	2022-11-27	XBB	EPI_ISL_16082351
2448	Orange	Southern CA	2022-11-27	XBB	EPI_ISL_16082353
2440	Los Angeles	Southern CA	2022-11-27	XBB	EPI_ISL_16082376
2442	Los Angeles	Southern CA	2022-11-27	XBB	EPI_ISL_16082400
2561	Riverside	Southern CA	2022-11-28	XBB	EPI_ISL_16082430
2558	Riverside	Southern CA	2022-11-28	XBB	EPI_ISL_16082470
2493	Los Angeles	Southern CA	2022-11-28	XBB	EPI_ISL_16082502
2567	Riverside	Southern CA	2022-11-28	Unclassified	EPI_ISL_16082518
2496	Los Angeles	Southern CA	2022-11-28	XBB	EPI_ISL_16082521
2508	Los Angeles	Southern CA	2022-11-28	XBB	EPI_ISL_16082538
2562	San Mateo	ABAHO	2022-11-28	XBB	EPI_ISL_16082551
2498	San Francisco	ABAHO	2022-11-28	XBB	EPI_ISL_16082584
2560	Riverside	Southern CA	2022-11-28	XBB	EPI_ISL_16082611
2515	San Diego	Southern CA	2022-11-28	XBB	EPI_ISL_16082686
2495	Los Angeles	Southern CA	2022-11-28	XBB	EPI_ISL_16082753
2516	San Diego	Southern CA	2022-11-28	XBB	EPI_ISL_16082842
2499	Imperial	Southern CA	2022-11-28	XBB	EPI_ISL_16082864
2551	Los Angeles	Southern CA	2022-11-28	XBB	EPI_ISL_16082873
2494	Los Angeles	Southern CA	2022-11-28	XBB	EPI_ISL_16082875
2575	Orange	Southern CA	2022-11-29	XBB	EPI_ISL_16082928
2572	Los Angeles	Southern CA	2022-11-29	XBB	EPI_ISL_16082948
2584	San Diego	Southern CA	2022-11-29	XBB	EPI_ISL_16082984
2585	San Diego	Southern CA	2022-11-29	XBB	EPI_ISL_16082993
2609	Los Angeles	Southern CA	2022-11-29	XBB	EPI_ISL_16083003
2616	San Mateo	ABAHO	2022-11-29	XBB	EPI_ISL_16083004
2569	Los Angeles	Southern CA	2022-11-29	XBB	EPI_ISL_16083026
2744	San Mateo	ABAHO	2022-12-02	XBB	EPI_ISL_16085393
2580	San Mateo	ABAHO	2022-11-29	XBB	EPI_ISL_16085403
1909	Unknown	Unknown	2022-11-10	XBB	EPI_ISL_16087660
2046	Unknown	Unknown	2022-11-15	XBB	EPI_ISL_16087729
2007	Unknown	Unknown	2022-11-14	XBB	EPI_ISL_16087803
2004	Unknown	Unknown	2022-11-14	XBB	EPI_ISL_16087814
1994	Unknown	SJVC	2022-11-14	XBD	EPI_ISL_16087827
2006	Unknown	Unknown	2022-11-14	XBB	EPI_ISL_16087862
1890	Unknown	Unknown	2022-11-09	XBB	EPI_ISL_16087874
2092	Unknown	Unknown	2022-11-16	XBB	EPI_ISL_16087881
2045	Unknown	Unknown	2022-11-15	XBB	EPI_ISL_16087898
1993	Unknown	Southern CA	2022-11-14	XBB	EPI_ISL_16087904
1625	Unknown	Unknown	2022-10-06	XBB	EPI_ISL_16087916
2042	Unknown	Unknown	2022-11-15	XBB	EPI_ISL_16087961
2091	Unknown	Unknown	2022-11-16	XBB	EPI_ISL_16088002
1897	Unknown	Southern CA	2022-11-10	XBE	EPI_ISL_16088050
1869	Unknown	Unknown	2022-11-08	XBB	EPI_ISL_16088151
1873	Unknown	Unknown	2022-11-08	XBB	EPI_ISL_16088214
1804	Unknown	Southern CA	2022-11-03	XBB	EPI_ISL_16088216
1874	Unknown	Unknown	2022-11-08	XBB	EPI_ISL_16088244
2480	Los Angeles	Southern CA	2022-11-27	XBB	EPI_ISL_16089026
2434	Contra Costa	ABAHO	2022-11-27	XBB	EPI_ISL_16089031
2443	Los Angeles	Southern CA	2022-11-27	XBB	EPI_ISL_16089118
2430	Los Angeles	Southern CA	2022-11-27	XBB	EPI_ISL_16089121
2438	Los Angeles	Southern CA	2022-11-27	XBB	EPI_ISL_16089129
2482	Riverside	Southern CA	2022-11-27	XBB	EPI_ISL_16089131
2433	San Bernardino	Southern CA	2022-11-27	XBB	EPI_ISL_16089138
2446	Los Angeles	Southern CA	2022-11-27	XBB	EPI_ISL_16089204
2439	Los Angeles	Southern CA	2022-11-27	XBB	EPI_ISL_16089227
2506	Los Angeles	Southern CA	2022-11-28	XBB	EPI_ISL_16089385
2556	San Bernardino	Southern CA	2022-11-28	XBB	EPI_ISL_16089410
2557	Orange	Southern CA	2022-11-28	XBB	EPI_ISL_16089417
2497	Riverside	Southern CA	2022-11-28	XBB	EPI_ISL_16089440
2552	Los Angeles	Southern CA	2022-11-28	XBB	EPI_ISL_16089451
2555	Riverside	Southern CA	2022-11-28	XBB	EPI_ISL_16089487
2514	San Diego	Southern CA	2022-11-28	XBB	EPI_ISL_16089523
2509	Los Angeles	Southern CA	2022-11-28	XBB	EPI_ISL_16089546
2408	San Francisco	ABAHO	2022-11-26	XBD	EPI_ISL_16091132
2371	San Francisco	ABAHO	2022-11-25	XBB	EPI_ISL_16101014
1606	San Diego	Southern CA	2022-10-02	XBB	EPI_ISL_16102585
1608	San Diego	Southern CA	2022-10-03	XBB	EPI_ISL_16102596
1609	San Diego	Southern CA	2022-10-03	XBB	EPI_ISL_16102597
1667	San Diego	Southern CA	2022-10-14	XBB	EPI_ISL_16102662
1633	San Diego	Southern CA	2022-10-07	XBB	EPI_ISL_16102781
1654	San Diego	Southern CA	2022-10-12	XBB	EPI_ISL_16102784
1513	Santa Clara	ABAHO	2022-08-15	XAZ	EPI_ISL_16105227
1519	Santa Clara	ABAHO	2022-08-18	XAS	EPI_ISL_16105268
1671	Santa Clara	ABAHO	2022-10-15	XBB	EPI_ISL_16105410
1771	Santa Clara	ABAHO	2022-11-01	XBB	EPI_ISL_16105563
1745	Santa Clara	ABAHO	2022-10-29	XBB	EPI_ISL_16105582
1744	Santa Clara	ABAHO	2022-10-29	XBB	EPI_ISL_16105667
1814	Santa Clara	ABAHO	2022-11-04	XBB	EPI_ISL_16105697
1820	Santa Clara	ABAHO	2022-11-04	XBB	EPI_ISL_16105701
1815	Santa Clara	ABAHO	2022-11-04	XBB	EPI_ISL_16105705
1835	Santa Clara	ABAHO	2022-11-06	XBB	EPI_ISL_16105762
2198	San Mateo	ABAHO	2022-11-20	XBC	EPI_ISL_1611824
2632	San Mateo	ABAHO	2022-11-30	XBB	EPI_ISL_16130274
2639	San Diego	Southern CA	2022-11-30	XBB	EPI_ISL_16130317
2698	San Diego	Southern CA	2022-12-01	XBB	EPI_ISL_16130440
2741	Los Angeles	Southern CA	2022-12-02	XBB	EPI_ISL_16130445
2436	Fresno	SJVC	2022-11-27	XBB	EPI_ISL_16130488
2570	Orange	Southern CA	2022-11-29	XBB	EPI_ISL_16130692
2613	Sacramento	Greater Sac	2022-11-29	XBB	EPI_ISL_16130706
2610	Los Angeles	Southern CA	2022-11-29	XBB	EPI_ISL_16130722
2614	Orange	Southern CA	2022-11-29	XBB	EPI_ISL_16130775
2608	Los Angeles	Southern CA	2022-11-29	XBB	EPI_ISL_16130777
2615	Orange	Southern CA	2022-11-29	XBB	EPI_ISL_16130778
2583	San Diego	Southern CA	2022-11-29	XBB	EPI_ISL_16130815
2633	Riverside	Southern CA	2022-11-30	XBB	EPI_ISL_16131125
2630	Los Angeles	Southern CA	2022-11-30	XBB	EPI_ISL_16131133
2627	Los Angeles	Southern CA	2022-11-30	XBB	EPI_ISL_16131229
2629	Los Angeles	Southern CA	2022-11-30	XBB	EPI_ISL_16131230
2634	Orange	Southern CA	2022-11-30	XBB	EPI_ISL_16131235
2674	Orange	Southern CA	2022-11-30	XBB	EPI_ISL_16131259
2675	Orange	Southern CA	2022-11-30	XBB	EPI_ISL_16131264
2631	Riverside	Southern CA	2022-11-30	XBB	EPI_ISL_16131278
2686	Los Angeles	Southern CA	2022-12-01	XBB	EPI_ISL_16131418
2693	Orange	Southern CA	2022-12-01	XBB	EPI_ISL_16131487
2697	San Diego	Southern CA	2022-12-01	XBB	EPI_ISL_16131488
2728	Santa Clara	ABAHO	2022-12-01	XBE	EPI_ISL_16131492
2684	Santa Clara	ABAHO	2022-12-01	XBB	EPI_ISL_16131493
2680	Santa Clara	ABAHO	2022-12-01	XBB	EPI_ISL_16131528
2691	Orange	Southern CA	2022-12-01	XBB	EPI_ISL_16131576
2682	Los Angeles	Southern CA	2022-12-01	XBB	EPI_ISL_16131587
2775	Riverside	Southern CA	2022-12-02	XBB	EPI_ISL_16131713
2774	Riverside	Southern CA	2022-12-02	XBB	EPI_ISL_16131714
2734	Los Angeles	Southern CA	2022-12-02	XBB	EPI_ISL_16131792
2740	San Joaquin	SJVC	2022-12-02	XBB	EPI_ISL_16131812
2772	San Bernardino	Southern CA	2022-12-02	XBB	EPI_ISL_16131831
96	Unknown	Southern CA	2021-04-02	XB	EPI_ISL_1614082
2689	Los Angeles	Southern CA	2022-12-01	XBB.1.5	EPI_ISL_16158859
2724	Riverside	Southern CA	2022-12-01	XBB	EPI_ISL_16158891
2683	Los Angeles	Southern CA	2022-12-01	XBB	EPI_ISL_16158901
2687	Los Angeles	Southern CA	2022-12-01	XBB.1.5	EPI_ISL_16158950
2776	Los Angeles	Southern CA	2022-12-02	XBB	EPI_ISL_16159188
2768	Los Angeles	Southern CA	2022-12-02	XBB	EPI_ISL_16159217
2736	Los Angeles	Southern CA	2022-12-02	XBB	EPI_ISL_16159249
2735	Los Angeles	Southern CA	2022-12-02	XBB	EPI_ISL_16159283
2747	San Diego	Southern CA	2022-12-02	XBB	EPI_ISL_16159320
2783	Los Angeles	Southern CA	2022-12-03	XBB	EPI_ISL_16159349
2086	Santa Clara	ABAHO	2022-11-16	XBB	EPI_ISL_16161811
2181	Santa Clara	ABAHO	2022-11-19	XBB	EPI_ISL_16161871
2261	Santa Clara	ABAHO	2022-11-22	XBB	EPI_ISL_16161944
1823	Unknown	Unknown	2022-11-04	XBB	EPI_ISL_16164823
2739	San Francisco	ABAHO	2022-12-02	XBB	EPI_ISL_16168429
2821	Los Angeles	Southern CA	2022-12-04	XBB	EPI_ISL_16168721
2819	Riverside	Southern CA	2022-12-04	XBB	EPI_ISL_16168769
2822	Los Angeles	Southern CA	2022-12-04	XBB	EPI_ISL_16168772
2815	Los Angeles	Southern CA	2022-12-04	XBB	EPI_ISL_16168782
2858	Los Angeles	Southern CA	2022-12-05	XBB	EPI_ISL_16168845
2903	Los Angeles	Southern CA	2022-12-06	XBB	EPI_ISL_16169142
2948	Riverside	Southern CA	2022-12-06	XBB.1.5	EPI_ISL_16169215
2910	Los Angeles	Southern CA	2022-12-06	XBB	EPI_ISL_16169218
2960	Los Angeles	Southern CA	2022-12-07	XBB.1.5	EPI_ISL_16169355
2968	Los Angeles	Southern CA	2022-12-07	XBB	EPI_ISL_16169388
3005	Orange	Southern CA	2022-12-07	XBB.1.5	EPI_ISL_16169417
2969	Los Angeles	Southern CA	2022-12-07	XBB	EPI_ISL_16169430
2973	Orange	Southern CA	2022-12-07	XBB	EPI_ISL_16169502
2582	Sonoma	ABAHO	2022-11-29	XBB.1.5	EPI_ISL_16171341
3275	San Mateo	ABAHO	2022-12-13	XBB	EPI_ISL_16183716
2829	San Diego	Southern CA	2022-12-04	XBB	EPI_ISL_16184124
2826	San Diego	Southern CA	2022-12-04	Unclassified	EPI_ISL_1618418
2830	San Diego	Southern CA	2022-12-04	XBB	EPI_ISL_16184225
2796	San Diego	Southern CA	2022-12-03	XBB	EPI_ISL_1618423
2788	Los Angeles	Southern CA	2022-12-03	XBB	EPI_ISL_1618429
2816	Los Angeles	Southern CA	2022-12-04	XBB	EPI_ISL_16184314
2828	San Diego	Southern CA	2022-12-04	XBB	EPI_ISL_16184369
2827	San Diego	Southern CA	2022-12-04	XBB	EPI_ISL_1618437
2746	San Diego	Southern CA	2022-12-02	XBB	EPI_ISL_161844
2866	Los Angeles	Southern CA	2022-12-05	XBB	EPI_ISL_1618441
2865	Los Angeles	Southern CA	2022-12-05	XBB	EPI_ISL_16184432
2785	Los Angeles	Southern CA	2022-12-03	XBB	EPI_ISL_1618444
2795	San Diego	Southern CA	2022-12-03	XBB	EPI_ISL_1618449
2851	Contra Costa	ABAHO	2022-12-05	Unclassified	EPI_ISL_1618454
2867	Los Angeles	Southern CA	2022-12-05	XBB	EPI_ISL_1618463
2247	Unknown	Unknown	2022-11-21	XBB	EPI_ISL_16188263
2182	Unknown	Southern CA	2022-11-19	XBB	EPI_ISL_16188282
2123	Unknown	Unknown	2022-11-17	XBB	EPI_ISL_16188289
2249	Unknown	Unknown	2022-11-21	XBB	EPI_ISL_16188291
2105	Unknown	Southern CA	2022-11-16	XBB	EPI_ISL_16188295
2120	Unknown	Unknown	2022-11-17	XBB	EPI_ISL_16188310
2203	Unknown	Unknown	2022-11-20	XBB	EPI_ISL_16188325
2204	Unknown	Unknown	2022-11-20	XBE	EPI_ISL_16188365
1910	Unknown	Unknown	2022-11-10	XBB	EPI_ISL_16188422
2121	Unknown	Unknown	2022-11-17	XBB	EPI_ISL_16188441
2243	Unknown	Unknown	2022-11-21	XBB	EPI_ISL_16188454
2124	Unknown	Unknown	2022-11-17	XBB	EPI_ISL_16188462
1979	Unknown	Unknown	2022-11-13	XBB	EPI_ISL_16188483
2262	Unknown	Southern CA	2022-11-22	XBB	EPI_ISL_16188506
2125	Unknown	Unknown	2022-11-17	XBB	EPI_ISL_16188511
2248	Unknown	Unknown	2022-11-21	XBB	EPI_ISL_16188549
2242	Unknown	Unknown	2022-11-21	XBB	EPI_ISL_16188596
2241	Unknown	Unknown	2022-11-21	XBB	EPI_ISL_16188645
2223	Unknown	Southern CA	2022-11-21	XBB	EPI_ISL_16188749
1905	Unknown	Unknown	2022-11-10	XBB	EPI_ISL_16188767
1970	Unknown	Southern CA	2022-11-13	XBB	EPI_ISL_16188769
2286	Unknown	Unknown	2022-11-22	XBB	EPI_ISL_16188772
1968	Unknown	Southern CA	2022-11-13	XBB	EPI_ISL_16188773
2244	Unknown	Unknown	2022-11-21	XBB	EPI_ISL_16188802
2246	Unknown	Unknown	2022-11-21	XBB	EPI_ISL_16188804
1906	Unknown	Unknown	2022-11-10	XBB	EPI_ISL_16188919
2205	Unknown	Unknown	2022-11-20	XBJ	EPI_ISL_16188935
2245	Unknown	Unknown	2022-11-21	XBB	EPI_ISL_16188944
2122	Unknown	Unknown	2022-11-17	XBB	EPI_ISL_16188950
2225	Unknown	Southern CA	2022-11-21	XBC	EPI_ISL_16189031
2284	Unknown	Unknown	2022-11-22	XBB	EPI_ISL_16189036
2274	Unknown	Southern CA	2022-11-22	XBB	EPI_ISL_16189070
2202	Unknown	Unknown	2022-11-20	XBB	EPI_ISL_16189139
2126	Unknown	Unknown	2022-11-17	XBB	EPI_ISL_16189145
1977	Unknown	Unknown	2022-11-13	XBB	EPI_ISL_16189177
2094	Unknown	Unknown	2022-11-16	XBB	EPI_ISL_16189186
2043	Unknown	Unknown	2022-11-15	XBB	EPI_ISL_16189200
2282	Unknown	Unknown	2022-11-22	XBB	EPI_ISL_16189226
2093	Unknown	Unknown	2022-11-16	XBB	EPI_ISL_16189274
2168	Unknown	Unknown	2022-11-18	XBB	EPI_ISL_16189302
2044	Unknown	Unknown	2022-11-15	XBB	EPI_ISL_16189308
2240	Unknown	Unknown	2022-11-21	XBB	EPI_ISL_16189311
2095	Unknown	Unknown	2022-11-16	XBB	EPI_ISL_16189416
3077	Unknown	Southern CA	2022-12-09	XBB	EPI_ISL_16207166
2957	Unknown	Southern CA	2022-12-06	XBB.1.5	EPI_ISL_16207261
2824	Unknown	Greater Sac	2022-12-04	XBB	EPI_ISL_16208034
3192	Unknown	Southern CA	2022-12-11	XBB	EPI_ISL_16208597
1798	Contra Costa	ABAHO	2022-11-03	XBB	EPI_ISL_16209432
1939	Contra Costa	ABAHO	2022-11-12	XBB	EPI_ISL_16209440
1899	Contra Costa	ABAHO	2022-11-10	XBB	EPI_ISL_16209455
3004	Unknown	Southern CA	2022-12-07	XBB.1.5	EPI_ISL_16209625
3067	Unknown	SJVC	2022-12-08	XBB	EPI_ISL_16209634
2447	Unknown	Southern CA	2022-11-27	XBB	EPI_ISL_16221759
2201	Unknown	Unknown	2022-11-20	XBB	EPI_ISL_16221775
2475	Unknown	Unknown	2022-11-27	XBB	EPI_ISL_16221788
2344	Unknown	Unknown	2022-11-24	XBE	EPI_ISL_16221811
2669	Unknown	Unknown	2022-11-30	XBB	EPI_ISL_16221846
2260	Unknown	Southern CA	2022-11-22	XBB	EPI_ISL_16221847
2406	Unknown	Southern CA	2022-11-26	XBB	EPI_ISL_16221866
2668	Unknown	Unknown	2022-11-30	XBB	EPI_ISL_16221912
2096	Unknown	Unknown	2022-11-16	XBB	EPI_ISL_16221988
2444	Unknown	Southern CA	2022-11-27	XBB	EPI_ISL_16221997
2228	Unknown	Southern CA	2022-11-21	XBB	EPI_ISL_16222035
2423	Unknown	Unknown	2022-11-26	XBB	EPI_ISL_16222043
2607	Unknown	Unknown	2022-11-29	XBB.1.5	EPI_ISL_16222061
2191	Unknown	Unknown	2022-11-19	XBB	EPI_ISL_16222104
2169	Unknown	Unknown	2022-11-18	XBB	EPI_ISL_16222130
2476	Unknown	Unknown	2022-11-27	XBB	EPI_ISL_16222150
2472	Unknown	Unknown	2022-11-27	XBB	EPI_ISL_16222163
2336	Unknown	Southern CA	2022-11-24	XBB.1.5	EPI_ISL_16222168
2313	Unknown	Unknown	2022-11-23	XBB	EPI_ISL_16222178
2542	Unknown	Unknown	2022-11-28	XBB	EPI_ISL_16222208
2421	Unknown	Unknown	2022-11-26	XBB	EPI_ISL_16222209
2283	Unknown	Unknown	2022-11-22	XBB	EPI_ISL_16222337
1787	Unknown	Unknown	2022-11-02	XBB	EPI_ISL_16222345
2047	Unknown	Unknown	2022-11-15	XBB	EPI_ISL_16222352
1978	Unknown	Unknown	2022-11-13	XBB	EPI_ISL_16222361
1868	Unknown	Unknown	2022-11-08	XBB	EPI_ISL_16222435
1781	Unknown	Southern CA	2022-11-02	XBB	EPI_ISL_16222443
1809	Unknown	Unknown	2022-11-03	XBJ	EPI_ISL_16222479
2504	Orange	Southern CA	2022-11-28	XBB	EPI_ISL_16225733
2501	Orange	Southern CA	2022-11-28	XBB	EPI_ISL_16225735
2574	Orange	Southern CA	2022-11-29	XBF	EPI_ISL_16225747
2731	Orange	Southern CA	2022-12-01	XBB	EPI_ISL_16225752
2291	Fresno	SJVC	2022-11-23	XBB	EPI_ISL_16226146
2451	Los Angeles	Southern CA	2022-11-27	XBB	EPI_ISL_16226191
2699	Los Angeles	Southern CA	2022-12-01	XBB	EPI_ISL_16226196
2147	Los Angeles	Southern CA	2022-11-18	XBB	EPI_ISL_16226226
2279	Los Angeles	Southern CA	2022-11-22	XBB	EPI_ISL_1622623
2154	Los Angeles	Southern CA	2022-11-18	XBB	EPI_ISL_16226231
2162	Los Angeles	Southern CA	2022-11-18	XBB	EPI_ISL_16226235
2797	Los Angeles	Southern CA	2022-12-03	XBB	EPI_ISL_1622624
2412	Los Angeles	Southern CA	2022-11-26	XBB	EPI_ISL_16226241
2626	Los Angeles	Southern CA	2022-11-29	XBB	EPI_ISL_16226279
2700	Los Angeles	Southern CA	2022-12-01	XBB	EPI_ISL_1622628
2586	Los Angeles	Southern CA	2022-11-29	XBB	EPI_ISL_1622629
2611	Unknown	ABAHO	2022-11-29	XBB	EPI_ISL_1622629
2655	Los Angeles	Southern CA	2022-11-30	XBB.1.5	EPI_ISL_1622631
2334	Madera	SJVC	2022-11-23	XBB	EPI_ISL_16226313
2679	Marin	ABAHO	2022-11-30	XBB	EPI_ISL_16226321
2599	Los Angeles	Southern CA	2022-11-29	XBB.1.5	EPI_ISL_1622633
2579	Alameda	ABAHO	2022-11-29	XBB	EPI_ISL_1622638
2517	San Diego	Southern CA	2022-11-28	XBB	EPI_ISL_16226487
2873	San Diego	Southern CA	2022-12-05	XBB	EPI_ISL_16226513
2751	San Diego	Southern CA	2022-12-02	XBB	EPI_ISL_16226514
2752	San Diego	Southern CA	2022-12-02	XBB	EPI_ISL_16226515
2753	San Diego	Southern CA	2022-12-02	XBB	EPI_ISL_16226516
2798	San Diego	Southern CA	2022-12-03	XBB	EPI_ISL_16226518
2799	San Diego	Southern CA	2022-12-03	XBB	EPI_ISL_16226519
2800	San Diego	Southern CA	2022-12-03	XBB	EPI_ISL_16226521
2801	San Diego	Southern CA	2022-12-03	XBB	EPI_ISL_16226522
2802	San Diego	Southern CA	2022-12-03	XBB	EPI_ISL_16226523
2803	San Diego	Southern CA	2022-12-03	XBB	EPI_ISL_16226524
2831	San Diego	Southern CA	2022-12-04	XBB	EPI_ISL_16226529
2874	San Diego	Southern CA	2022-12-05	XBB	EPI_ISL_16226533
2875	San Diego	Southern CA	2022-12-05	XBB	EPI_ISL_16226534
2876	San Diego	Southern CA	2022-12-05	XBB	EPI_ISL_16226537
2877	San Diego	Southern CA	2022-12-05	XBB	EPI_ISL_16226547
2878	San Diego	Southern CA	2022-12-05	XBB	EPI_ISL_16226549
2832	San Diego	Southern CA	2022-12-04	XBB	EPI_ISL_1622655
2879	San Diego	Southern CA	2022-12-05	XBB	EPI_ISL_16226552
2754	San Diego	Southern CA	2022-12-02	XBB	EPI_ISL_16226556
2755	San Diego	Southern CA	2022-12-02	XBB	EPI_ISL_16226557
2756	San Diego	Southern CA	2022-12-02	XBB	EPI_ISL_16226558
2757	San Diego	Southern CA	2022-12-02	XBB	EPI_ISL_16226559
2758	San Diego	Southern CA	2022-12-02	XBB	EPI_ISL_1622656
2713	San Diego	Southern CA	2022-12-01	XBB.1.5	EPI_ISL_16226583
2723	San Francisco	ABAHO	2022-12-01	XBB	EPI_ISL_1622659
2289	San Francisco	ABAHO	2022-11-22	XBB	EPI_ISL_16226591
2290	San Francisco	ABAHO	2022-11-22	XBB	EPI_ISL_16226594
2855	San Mateo	ABAHO	2022-12-05	XBB	EPI_ISL_16226618
2301	Santa Cruz	ABAHO	2022-11-23	XBB	EPI_ISL_16226653
2820	Santa Cruz	ABAHO	2022-12-04	XBB.1.5	EPI_ISL_16226655
2437	Santa Cruz	ABAHO	2022-11-27	Unclassified	EPI_ISL_16226656
2730	Santa Cruz	ABAHO	2022-12-01	Unclassified	EPI_ISL_16226661
2727	Santa Cruz	ABAHO	2022-12-01	XBB	EPI_ISL_16226662
2726	Tuolumne	SJVC	2022-12-01	XBB	EPI_ISL_16226748
1702	San Francisco	ABAHO	2022-10-20	XBB	EPI_ISL_1622683
1999	Los Angeles	Southern CA	2022-11-14	XBB	EPI_ISL_16226848
2140	Alameda	ABAHO	2022-11-17	XBB	EPI_ISL_16226854
2292	Amador	Greater Sac	2022-11-23	XBB	EPI_ISL_16226872
1951	Contra Costa	ABAHO	2022-11-12	XBB	EPI_ISL_16226922
1950	Contra Costa	ABAHO	2022-11-12	XBB	EPI_ISL_16226926
2030	Fresno	SJVC	2022-11-15	XBB	EPI_ISL_16226944
2141	Imperial	Southern CA	2022-11-17	XBB	EPI_ISL_162271
2054	Imperial	Southern CA	2022-11-15	XBB	EPI_ISL_1622711
2114	Los Angeles	Southern CA	2022-11-17	XBB	EPI_ISL_16227112
2139	Imperial	Southern CA	2022-11-17	XBB	EPI_ISL_1622712
2138	Imperial	Southern CA	2022-11-17	XBB	EPI_ISL_1622713
2135	Imperial	Southern CA	2022-11-17	XBB	EPI_ISL_1622714
2136	Imperial	Southern CA	2022-11-17	XBB	EPI_ISL_1622715
2297	Los Angeles	Southern CA	2022-11-23	XBB	EPI_ISL_16227154
2137	Imperial	Southern CA	2022-11-17	XBB	EPI_ISL_1622716
2056	Imperial	Southern CA	2022-11-15	XBB	EPI_ISL_1622717
2055	Imperial	Southern CA	2022-11-15	XBB	EPI_ISL_1622718
2053	Imperial	Southern CA	2022-11-15	XBB	EPI_ISL_1622719
2087	Los Angeles	Southern CA	2022-11-16	XBB	EPI_ISL_1622719
1830	Imperial	Southern CA	2022-11-05	XBB	EPI_ISL_162272
2102	Imperial	Southern CA	2022-11-16	XBB	EPI_ISL_162272
2101	Imperial	Southern CA	2022-11-16	XBB	EPI_ISL_1622721
2100	Imperial	Southern CA	2022-11-16	XBB	EPI_ISL_1622722
2142	Merced	SJVC	2022-11-17	XBB	EPI_ISL_16227236
2061	Imperial	Southern CA	2022-11-15	XBB	EPI_ISL_1622724
2063	Imperial	Southern CA	2022-11-15	XBB	EPI_ISL_1622725
2062	Imperial	Southern CA	2022-11-15	XBB	EPI_ISL_1622726
2059	Imperial	Southern CA	2022-11-15	XBB	EPI_ISL_1622727
2060	Imperial	Southern CA	2022-11-15	XBB	EPI_ISL_1622728
2058	Imperial	Southern CA	2022-11-15	XBB	EPI_ISL_1622729
2057	Imperial	Southern CA	2022-11-15	XBB	EPI_ISL_162273
2134	Imperial	Southern CA	2022-11-17	XBB	EPI_ISL_162273
2071	Imperial	Southern CA	2022-11-15	XBB	EPI_ISL_1622731
2070	Imperial	Southern CA	2022-11-15	XBB	EPI_ISL_1622732
2069	Imperial	Southern CA	2022-11-15	XBB	EPI_ISL_1622733
2067	Imperial	Southern CA	2022-11-15	XBB	EPI_ISL_1622734
2068	Imperial	Southern CA	2022-11-15	XBB	EPI_ISL_1622735
2066	Imperial	Southern CA	2022-11-15	XBB	EPI_ISL_1622736
1960	San Bernardino	Southern CA	2022-11-12	XBB	EPI_ISL_16227366
1961	San Bernardino	Southern CA	2022-11-12	XBB	EPI_ISL_16227367
2065	Imperial	Southern CA	2022-11-15	XBB	EPI_ISL_1622737
2064	Imperial	Southern CA	2022-11-15	XBB	EPI_ISL_1622738
2020	Imperial	Southern CA	2022-11-14	XBB	EPI_ISL_1622739
2133	Imperial	Southern CA	2022-11-17	XBB	EPI_ISL_162274
2016	Imperial	Southern CA	2022-11-14	XBB	EPI_ISL_1622741
2379	San Diego	Southern CA	2022-11-25	XBB	EPI_ISL_1622741
2017	Imperial	Southern CA	2022-11-14	XBB	EPI_ISL_1622742
1784	San Diego	Southern CA	2022-11-02	XBB	EPI_ISL_16227426
2032	San Diego	Southern CA	2022-11-15	XBB	EPI_ISL_16227427
2033	San Diego	Southern CA	2022-11-15	XBB	EPI_ISL_16227428
2000	San Diego	Southern CA	2022-11-14	XBB	EPI_ISL_1622743
2019	Imperial	Southern CA	2022-11-14	XBB	EPI_ISL_1622743
2034	San Diego	Southern CA	2022-11-15	XBB	EPI_ISL_16227435
2035	San Diego	Southern CA	2022-11-15	XBB	EPI_ISL_16227436
2036	San Diego	Southern CA	2022-11-15	XBB	EPI_ISL_16227437
2037	San Diego	Southern CA	2022-11-15	XBB	EPI_ISL_16227438
2038	San Diego	Southern CA	2022-11-15	XBB	EPI_ISL_16227439
2018	Imperial	Southern CA	2022-11-14	XBB	EPI_ISL_1622744
2039	San Diego	Southern CA	2022-11-15	XBB	EPI_ISL_1622744
2088	San Diego	Southern CA	2022-11-16	XBB	EPI_ISL_16227444
2015	Imperial	Southern CA	2022-11-14	XBB	EPI_ISL_1622745
2027	Imperial	Southern CA	2022-11-14	XBB	EPI_ISL_1622746
1971	San Diego	Southern CA	2022-11-13	XBB	EPI_ISL_16227469
1972	San Diego	Southern CA	2022-11-13	XBB	EPI_ISL_1622747
2026	Imperial	Southern CA	2022-11-14	XBB	EPI_ISL_1622747
2310	San Diego	Southern CA	2022-11-23	XBB	EPI_ISL_1622747
2040	San Diego	Southern CA	2022-11-15	XBB	EPI_ISL_16227472
1954	San Diego	Southern CA	2022-11-12	XBB	EPI_ISL_16227475
1902	San Diego	Southern CA	2022-11-10	XBB	EPI_ISL_16227478
1903	San Diego	Southern CA	2022-11-10	XBB	EPI_ISL_16227479
2025	Imperial	Southern CA	2022-11-14	XBB	EPI_ISL_1622748
2023	Imperial	Southern CA	2022-11-14	XBB	EPI_ISL_1622749
2312	San Diego	Southern CA	2022-11-23	XBB	EPI_ISL_1622749
2337	San Diego	Southern CA	2022-11-24	XBB	EPI_ISL_16227492
2380	San Diego	Southern CA	2022-11-25	XBB	EPI_ISL_16227497
2381	San Diego	Southern CA	2022-11-25	XBB	EPI_ISL_16227498
2024	Imperial	Southern CA	2022-11-14	XBB	EPI_ISL_162275
2131	Imperial	Southern CA	2022-11-17	XBB	EPI_ISL_162275
2022	Imperial	Southern CA	2022-11-14	XBB	EPI_ISL_1622751
2339	San Diego	Southern CA	2022-11-24	XBB	EPI_ISL_1622751
2414	San Diego	Southern CA	2022-11-26	XBB	EPI_ISL_1622751
2386	San Diego	Southern CA	2022-11-25	XBB	EPI_ISL_16227511
2415	San Diego	Southern CA	2022-11-26	XBB	EPI_ISL_16227512
2340	San Diego	Southern CA	2022-11-24	XBB	EPI_ISL_16227513
2387	San Diego	Southern CA	2022-11-25	XBB	EPI_ISL_16227514
2416	San Diego	Southern CA	2022-11-26	XBB	EPI_ISL_16227515
2417	San Diego	Southern CA	2022-11-26	XBB	EPI_ISL_16227516
2418	San Diego	Southern CA	2022-11-26	XBB	EPI_ISL_16227517
2021	Imperial	Southern CA	2022-11-14	XBB	EPI_ISL_1622752
1996	San Francisco	ABAHO	2022-11-14	XBB	EPI_ISL_16227528
1982	Imperial	Southern CA	2022-11-13	XBB	EPI_ISL_1622753
1983	Imperial	Southern CA	2022-11-13	XBB	EPI_ISL_1622754
2382	San Diego	Southern CA	2022-11-25	XBB	EPI_ISL_1622754
2383	San Diego	Southern CA	2022-11-25	XBB	EPI_ISL_1622755
1984	Imperial	Southern CA	2022-11-13	XBB	EPI_ISL_1622756
2384	San Diego	Southern CA	2022-11-25	XBB	EPI_ISL_1622756
2491	San Mateo	ABAHO	2022-11-27	XBB	EPI_ISL_16227569
1985	Imperial	Southern CA	2022-11-13	XBB	EPI_ISL_1622757
1986	Imperial	Southern CA	2022-11-13	XBB	EPI_ISL_1622758
2385	San Diego	Southern CA	2022-11-25	XBB	EPI_ISL_1622758
2413	San Diego	Southern CA	2022-11-26	XBB	EPI_ISL_1622759
1990	Imperial	Southern CA	2022-11-13	XBB	EPI_ISL_162276
2132	Imperial	Southern CA	2022-11-17	XBB	EPI_ISL_162276
1987	Imperial	Southern CA	2022-11-13	XBB	EPI_ISL_1622761
2103	Solano	ABAHO	2022-11-16	XBB	EPI_ISL_16227629
1989	Tuolumne	SJVC	2022-11-13	XBB	EPI_ISL_1622769
1988	Tuolumne	SJVC	2022-11-13	XBB	EPI_ISL_16227695
2130	Imperial	Southern CA	2022-11-17	XBB	EPI_ISL_162277
2345	Imperial	Southern CA	2022-11-24	XBB	EPI_ISL_162277
2347	Imperial	Southern CA	2022-11-24	XBB	EPI_ISL_1622771
2348	Imperial	Southern CA	2022-11-24	XBB	EPI_ISL_1622774
2350	Imperial	Southern CA	2022-11-24	XBB	EPI_ISL_1622775
2351	Imperial	Southern CA	2022-11-24	XBB	EPI_ISL_1622776
1949	Ventura	Southern CA	2022-11-12	XBD	EPI_ISL_16227763
1965	Ventura	Southern CA	2022-11-12	XBD	EPI_ISL_16227764
2322	Imperial	Southern CA	2022-11-23	XBB	EPI_ISL_1622777
2374	Yolo	Greater Sac	2022-11-25	XBB	EPI_ISL_16227777
2354	Imperial	Southern CA	2022-11-24	XBB	EPI_ISL_1622779
2129	Imperial	Southern CA	2022-11-17	XBB	EPI_ISL_162278
2353	Imperial	Southern CA	2022-11-24	XBB	EPI_ISL_162278
2352	Imperial	Southern CA	2022-11-24	XBB	EPI_ISL_1622781
2737	Alameda	ABAHO	2022-12-02	XBB	EPI_ISL_16227827
2275	Alameda	ABAHO	2022-11-22	XBB	EPI_ISL_16227839
2323	Imperial	Southern CA	2022-11-23	XBB	EPI_ISL_1622785
2324	Imperial	Southern CA	2022-11-23	XBB	EPI_ISL_1622786
2325	Imperial	Southern CA	2022-11-23	XBB	EPI_ISL_1622787
2327	Imperial	Southern CA	2022-11-23	XBB	EPI_ISL_1622788
2143	Imperial	Southern CA	2022-11-17	XBB	EPI_ISL_162279
2329	Imperial	Southern CA	2022-11-23	XBB	EPI_ISL_162279
2780	Imperial	Southern CA	2022-12-02	XBB	EPI_ISL_16227911
2900	Imperial	Southern CA	2022-12-05	XBB	EPI_ISL_16227916
2899	Imperial	Southern CA	2022-12-05	XBB	EPI_ISL_16227918
2850	Imperial	Southern CA	2022-12-04	XBB	EPI_ISL_16227919
2330	Imperial	Southern CA	2022-11-23	XBB	EPI_ISL_1622792
2849	Imperial	Southern CA	2022-12-04	XBB	EPI_ISL_1622792
2848	Imperial	Southern CA	2022-12-04	XBB	EPI_ISL_16227921
2847	Imperial	Southern CA	2022-12-04	XBB	EPI_ISL_16227922
2813	Imperial	Southern CA	2022-12-03	XBB	EPI_ISL_16227928
2779	Imperial	Southern CA	2022-12-02	XBB	EPI_ISL_16227929
2332	Imperial	Southern CA	2022-11-23	XBB	EPI_ISL_1622793
2676	Imperial	Southern CA	2022-11-30	XBB	EPI_ISL_16227932
2725	Imperial	Southern CA	2022-12-01	XBB	EPI_ISL_16227933
2781	Imperial	Southern CA	2022-12-02	XBB	EPI_ISL_16227934
2174	Imperial	Southern CA	2022-11-18	XBB	EPI_ISL_16227935
2175	Imperial	Southern CA	2022-11-18	XBB	EPI_ISL_16227936
2173	Imperial	Southern CA	2022-11-18	XBB	EPI_ISL_16227938
2172	Imperial	Southern CA	2022-11-18	XBB	EPI_ISL_16227939
2171	Imperial	Southern CA	2022-11-18	XBB	EPI_ISL_1622794
2194	Imperial	Southern CA	2022-11-19	XBB	EPI_ISL_16227942
2179	Imperial	Southern CA	2022-11-18	XBB	EPI_ISL_16227946
2178	Imperial	Southern CA	2022-11-18	XBB	EPI_ISL_16227947
2177	Imperial	Southern CA	2022-11-18	XBB	EPI_ISL_16227948
2176	Imperial	Southern CA	2022-11-18	XBB	EPI_ISL_1622795
2618	Imperial	Southern CA	2022-11-29	XBB	EPI_ISL_16227953
2617	Imperial	Southern CA	2022-11-29	XBB	EPI_ISL_16227954
2678	Imperial	Southern CA	2022-11-30	XBB	EPI_ISL_16227955
2677	Imperial	Southern CA	2022-11-30	XBB	EPI_ISL_16227957
2625	Imperial	Southern CA	2022-11-29	XBB	EPI_ISL_16227958
2029	Kern	SJVC	2022-11-15	XBB	EPI_ISL_1622796
2622	Imperial	Southern CA	2022-11-29	XBB	EPI_ISL_1622796
2623	Imperial	Southern CA	2022-11-29	XBB	EPI_ISL_16227961
2624	Imperial	Southern CA	2022-11-29	XBB	EPI_ISL_16227962
2488	Imperial	Southern CA	2022-11-27	XBB	EPI_ISL_16227963
2487	Imperial	Southern CA	2022-11-27	XBB	EPI_ISL_16227964
2394	Imperial	Southern CA	2022-11-25	XBB	EPI_ISL_16227965
2395	Imperial	Southern CA	2022-11-25	XBB	EPI_ISL_16227966
2428	Imperial	Southern CA	2022-11-26	XBB	EPI_ISL_16227967
2396	Imperial	Southern CA	2022-11-25	XBB	EPI_ISL_16227969
2398	Imperial	Southern CA	2022-11-25	XBB	EPI_ISL_16227975
2328	Imperial	Southern CA	2022-11-23	XBB	EPI_ISL_16227977
2326	Imperial	Southern CA	2022-11-23	XBB	EPI_ISL_16227978
2331	Imperial	Southern CA	2022-11-23	XBB	EPI_ISL_1622798
2254	Imperial	Southern CA	2022-11-21	Unclassified	EPI_ISL_16227981
2333	Imperial	Southern CA	2022-11-23	XBB	EPI_ISL_16227984
2193	Imperial	Southern CA	2022-11-19	XBB	EPI_ISL_16227986
2209	Imperial	Southern CA	2022-11-20	XBB	EPI_ISL_16227989
2210	Imperial	Southern CA	2022-11-20	XBB	EPI_ISL_1622799
2577	Nevada	Greater Sac	2022-11-29	XBB	EPI_ISL_16228127
2621	San Bernardino	Southern CA	2022-11-29	XBB	EPI_ISL_16228165
2620	San Bernardino	Southern CA	2022-11-29	XBB	EPI_ISL_16228166
2619	San Bernardino	Southern CA	2022-11-29	XBB	EPI_ISL_16228167
2489	San Bernardino	Southern CA	2022-11-27	XBB	EPI_ISL_16228168
2566	San Bernardino	Southern CA	2022-11-28	XBB	EPI_ISL_16228169
2486	San Bernardino	Southern CA	2022-11-27	XBB	EPI_ISL_1622817
2502	San Bernardino	Southern CA	2022-11-28	XBB	EPI_ISL_16228178
2901	Monterey	ABAHO	2022-12-05	XBB	EPI_ISL_1622818
2184	San Diego	Southern CA	2022-11-19	XBB	EPI_ISL_16228196
2231	Los Angeles	Southern CA	2022-11-21	XBB	EPI_ISL_1622821
2236	San Diego	Southern CA	2022-11-21	XBB	EPI_ISL_16228212
2237	San Diego	Southern CA	2022-11-21	XBB	EPI_ISL_16228215
2238	San Diego	Southern CA	2022-11-21	XBB	EPI_ISL_16228218
2185	San Diego	Southern CA	2022-11-19	XBB	EPI_ISL_1622822
2232	Los Angeles	Southern CA	2022-11-21	XBB	EPI_ISL_1622822
2187	San Diego	Southern CA	2022-11-19	XBB	EPI_ISL_16228222
2188	San Diego	Southern CA	2022-11-19	XBB	EPI_ISL_16228225
2163	San Diego	Southern CA	2022-11-18	XBB	EPI_ISL_16228227
2701	San Diego	Southern CA	2022-12-01	XBB	EPI_ISL_16228229
2150	Los Angeles	Southern CA	2022-11-18	XBB	EPI_ISL_1622823
2233	San Diego	Southern CA	2022-11-21	XBB	EPI_ISL_1622823
2702	San Diego	Southern CA	2022-12-01	XBB	EPI_ISL_1622823
2703	San Diego	Southern CA	2022-12-01	XBB	EPI_ISL_16228231
2704	San Diego	Southern CA	2022-12-01	XBB	EPI_ISL_16228232
2705	San Diego	Southern CA	2022-12-01	XBB	EPI_ISL_16228233
2759	San Diego	Southern CA	2022-12-02	XBB	EPI_ISL_16228236
2706	San Diego	Southern CA	2022-12-01	XBB	EPI_ISL_16228238
2707	San Diego	Southern CA	2022-12-01	XBB	EPI_ISL_16228239
2151	Los Angeles	Southern CA	2022-11-18	XBB	EPI_ISL_1622824
2234	San Diego	Southern CA	2022-11-21	XBB	EPI_ISL_1622824
2760	San Diego	Southern CA	2022-12-02	XBB	EPI_ISL_16228241
2708	San Diego	Southern CA	2022-12-01	XBB	EPI_ISL_16228243
2709	San Diego	Southern CA	2022-12-01	XBB	EPI_ISL_16228245
2761	San Diego	Southern CA	2022-12-02	XBB	EPI_ISL_16228247
2762	San Diego	Southern CA	2022-12-02	XBB	EPI_ISL_16228248
2763	San Diego	Southern CA	2022-12-02	XBB	EPI_ISL_16228249
2186	San Diego	Southern CA	2022-11-19	XBB	EPI_ISL_1622825
2710	San Diego	Southern CA	2022-12-01	XBB	EPI_ISL_1622825
2711	San Diego	Southern CA	2022-12-01	XBB	EPI_ISL_16228252
2712	San Diego	Southern CA	2022-12-01	XBB	EPI_ISL_16228253
2642	San Diego	Southern CA	2022-11-30	XBB	EPI_ISL_16228256
2643	San Diego	Southern CA	2022-11-30	XBB	EPI_ISL_16228257
2644	San Diego	Southern CA	2022-11-30	XBB	EPI_ISL_16228259
2645	San Diego	Southern CA	2022-11-30	XBB	EPI_ISL_16228261
2646	San Diego	Southern CA	2022-11-30	XBB	EPI_ISL_16228262
2647	San Diego	Southern CA	2022-11-30	XBB	EPI_ISL_16228263
2587	San Diego	Southern CA	2022-11-29	XBB	EPI_ISL_16228265
2648	San Diego	Southern CA	2022-11-30	XBB	EPI_ISL_16228266
2649	San Diego	Southern CA	2022-11-30	XBB	EPI_ISL_16228269
2235	San Diego	Southern CA	2022-11-21	XBB	EPI_ISL_1622827
2650	San Diego	Southern CA	2022-11-30	XBB	EPI_ISL_1622827
2588	San Diego	Southern CA	2022-11-29	XBB	EPI_ISL_16228272
2589	San Diego	Southern CA	2022-11-29	XBB	EPI_ISL_16228273
2651	San Diego	Southern CA	2022-11-30	XBB	EPI_ISL_16228274
2652	San Diego	Southern CA	2022-11-30	XBB	EPI_ISL_16228278
2590	San Diego	Southern CA	2022-11-29	XBB	EPI_ISL_16228279
2591	San Diego	Southern CA	2022-11-29	XBB	EPI_ISL_16228281
2653	San Diego	Southern CA	2022-11-30	XBB	EPI_ISL_16228284
2592	San Diego	Southern CA	2022-11-29	XBB	EPI_ISL_16228285
2593	San Diego	Southern CA	2022-11-29	XBB	EPI_ISL_16228287
2594	San Diego	Southern CA	2022-11-29	XBB	EPI_ISL_16228288
2595	San Diego	Southern CA	2022-11-29	XBB	EPI_ISL_16228289
2518	San Diego	Southern CA	2022-11-28	XBB	EPI_ISL_16228292
2519	San Diego	Southern CA	2022-11-28	XBB	EPI_ISL_16228293
2596	San Diego	Southern CA	2022-11-29	XBB	EPI_ISL_16228294
2597	San Diego	Southern CA	2022-11-29	XBB	EPI_ISL_16228296
2189	San Diego	Southern CA	2022-11-19	XBB	EPI_ISL_1622831
2115	San Diego	Southern CA	2022-11-17	XBB	EPI_ISL_16228314
2164	San Diego	Southern CA	2022-11-18	XBB	EPI_ISL_16228317
2116	San Diego	Southern CA	2022-11-17	XBB	EPI_ISL_16228319
2117	San Diego	Southern CA	2022-11-17	XBB	EPI_ISL_16228329
2452	San Diego	Southern CA	2022-11-27	XBB	EPI_ISL_16228346
2521	San Diego	Southern CA	2022-11-28	XBB	EPI_ISL_16228347
2522	San Diego	Southern CA	2022-11-28	XBB	EPI_ISL_16228349
2523	San Diego	Southern CA	2022-11-28	XBB	EPI_ISL_1622835
2453	San Diego	Southern CA	2022-11-27	XBB	EPI_ISL_16228351
2454	San Diego	Southern CA	2022-11-27	XBB	EPI_ISL_16228352
2524	San Diego	Southern CA	2022-11-28	XBB	EPI_ISL_16228354
2525	San Diego	Southern CA	2022-11-28	XBB	EPI_ISL_16228355
2526	San Diego	Southern CA	2022-11-28	XBB	EPI_ISL_16228356
2455	San Diego	Southern CA	2022-11-27	XBB	EPI_ISL_16228357
2527	San Diego	Southern CA	2022-11-28	XBB	EPI_ISL_16228362
2528	San Diego	Southern CA	2022-11-28	XBB	EPI_ISL_16228368
2529	San Diego	Southern CA	2022-11-28	XBB	EPI_ISL_16228369
2456	San Diego	Southern CA	2022-11-27	XBB	EPI_ISL_1622837
2457	San Diego	Southern CA	2022-11-27	XBB	EPI_ISL_16228371
2458	San Diego	Southern CA	2022-11-27	XBB	EPI_ISL_16228372
2530	San Diego	Southern CA	2022-11-28	XBB	EPI_ISL_16228373
2459	San Diego	Southern CA	2022-11-27	XBB	EPI_ISL_16228375
2460	San Diego	Southern CA	2022-11-27	XBB	EPI_ISL_16228376
2461	San Diego	Southern CA	2022-11-27	XBB	EPI_ISL_16228377
2462	San Diego	Southern CA	2022-11-27	XBB	EPI_ISL_16228378
2463	San Diego	Southern CA	2022-11-27	XBB	EPI_ISL_16228379
2464	San Diego	Southern CA	2022-11-27	XBB	EPI_ISL_1622838
2465	San Diego	Southern CA	2022-11-27	XBB	EPI_ISL_16228381
2466	San Diego	Southern CA	2022-11-27	XBB	EPI_ISL_16228382
2467	San Diego	Southern CA	2022-11-27	XBB	EPI_ISL_16228384
2598	Los Angeles	Southern CA	2022-11-29	XBB	EPI_ISL_1622842
2918	San Mateo	ABAHO	2022-12-06	XBB	EPI_ISL_1622843
2520	Los Angeles	Southern CA	2022-11-28	XBB	EPI_ISL_1622844
2311	Los Angeles	Southern CA	2022-11-23	XBB	EPI_ISL_1622845
2224	Tuolumne	SJVC	2022-11-21	XBB	EPI_ISL_16228575
2503	Ventura	Southern CA	2022-11-28	XBB	EPI_ISL_16228614
2304	Ventura	Southern CA	2022-11-23	XBB	EPI_ISL_16228625
2302	Merced	SJVC	2022-11-23	XBB	EPI_ISL_1622881
2157	Solano	ABAHO	2022-11-18	XBB	EPI_ISL_16228954
1997	Solano	ABAHO	2022-11-14	XBB	EPI_ISL_16228964
2084	Napa	ABAHO	2022-11-16	XBB	EPI_ISL_16228965
2144	San Joaquin	SJVC	2022-11-17	XBE	EPI_ISL_16228991
2031	Santa Clara	ABAHO	2022-11-15	XBB	EPI_ISL_16228996
2638	Los Angeles	Southern CA	2022-11-30	XBB	EPI_ISL_1623537
2317	Orange	Southern CA	2022-11-23	XBB	EPI_ISL_16239312
2995	Unknown	Unknown	2022-12-07	XBB	EPI_ISL_16239334
2845	Unknown	Unknown	2022-12-04	XBF	EPI_ISL_16239336
3052	Unknown	Unknown	2022-12-08	XBB	EPI_ISL_16239343
2938	Unknown	Unknown	2022-12-06	XBB	EPI_ISL_16239366
3051	Unknown	Unknown	2022-12-08	XBB	EPI_ISL_16239367
3103	Unknown	Unknown	2022-12-09	XBB	EPI_ISL_16239368
3153	Unknown	Unknown	2022-12-10	XBB.1.5	EPI_ISL_16239369
2696	Los Angeles	Southern CA	2022-12-01	XBB	EPI_ISL_1623995
2571	Santa Barbara	Southern CA	2022-11-29	XBB	EPI_ISL_16242231
2161	Los Angeles	Southern CA	2022-11-18	XBB	EPI_ISL_1624424
2916	Alameda	ABAHO	2022-12-06	XBB	EPI_ISL_16246712
3032	Contra Costa	ABAHO	2022-12-08	XBB.1.5	EPI_ISL_1624672
2955	Imperial	Southern CA	2022-12-06	XBB	EPI_ISL_16246752
2954	Imperial	Southern CA	2022-12-06	XBB	EPI_ISL_16246754
2953	Imperial	Southern CA	2022-12-06	XBB	EPI_ISL_16246755
2952	Imperial	Southern CA	2022-12-06	XBB	EPI_ISL_16246758
2912	Lake	RANCHO	2022-12-06	XBB	EPI_ISL_16246762
2935	Los Angeles	Southern CA	2022-12-06	XBB.1.5	EPI_ISL_16246771
3040	Los Angeles	Southern CA	2022-12-08	XBB	EPI_ISL_16246772
3002	Los Angeles	Southern CA	2022-12-07	XBB	EPI_ISL_16246778
2978	Monterey	ABAHO	2022-12-07	XBD	EPI_ISL_1624683
2951	San Bernardino	Southern CA	2022-12-06	XBB	EPI_ISL_16246857
2956	San Bernardino	Southern CA	2022-12-06	XBB	EPI_ISL_16246858
2920	San Diego	Southern CA	2022-12-06	XBB	EPI_ISL_16246869
2921	San Diego	Southern CA	2022-12-06	XBB	EPI_ISL_1624687
2922	San Diego	Southern CA	2022-12-06	XBB	EPI_ISL_16246871
2923	San Diego	Southern CA	2022-12-06	XBB	EPI_ISL_16246872
2924	San Diego	Southern CA	2022-12-06	XBB	EPI_ISL_16246873
2926	San Diego	Southern CA	2022-12-06	XBB	EPI_ISL_16246874
2928	San Diego	Southern CA	2022-12-06	XBB	EPI_ISL_16246876
2929	San Diego	Southern CA	2022-12-06	XBB	EPI_ISL_1624688
2930	San Diego	Southern CA	2022-12-06	XBB	EPI_ISL_16246881
2931	San Diego	Southern CA	2022-12-06	XBB	EPI_ISL_16246884
2983	San Diego	Southern CA	2022-12-07	XBB	EPI_ISL_1624691
2933	San Diego	Southern CA	2022-12-06	XBB	EPI_ISL_16246911
2984	San Diego	Southern CA	2022-12-07	XBB	EPI_ISL_16246914
2986	San Diego	Southern CA	2022-12-07	XBB	EPI_ISL_16246916
2987	San Diego	Southern CA	2022-12-07	XBB	EPI_ISL_16246917
2988	San Diego	Southern CA	2022-12-07	XBB	EPI_ISL_1624692
2989	San Diego	Southern CA	2022-12-07	XBB	EPI_ISL_16246921
2990	San Diego	Southern CA	2022-12-07	XBB	EPI_ISL_16246922
2991	San Diego	Southern CA	2022-12-07	XBB	EPI_ISL_16246924
2992	San Diego	Southern CA	2022-12-07	XBB	EPI_ISL_16246925
3064	Santa Clara	ABAHO	2022-12-08	XBB	EPI_ISL_16246954
2981	San Diego	Southern CA	2022-12-07	XBB	EPI_ISL_1624696
3030	Santa Cruz	ABAHO	2022-12-08	XBB.1.5	EPI_ISL_16246963
2982	San Diego	Southern CA	2022-12-07	XBB	EPI_ISL_1624699
2985	San Diego	Southern CA	2022-12-07	XBB	EPI_ISL_16248817
3063	Los Angeles	Southern CA	2022-12-08	XBB	EPI_ISL_162511
3085	Orange	Southern CA	2022-12-09	XBB	EPI_ISL_1625116
3107	Contra Costa	ABAHO	2022-12-09	XBB.1.5	EPI_ISL_1625125
3075	Los Angeles	Southern CA	2022-12-09	XBB	EPI_ISL_1625132
3076	Fresno	SJVC	2022-12-09	XBB	EPI_ISL_1625163
3086	Ventura	Southern CA	2022-12-09	XBB	EPI_ISL_162517
3081	Los Angeles	Southern CA	2022-12-09	XBB	EPI_ISL_1625181
3088	Los Angeles	Southern CA	2022-12-09	XBB	EPI_ISL_1625188
3084	Santa Barbara	Southern CA	2022-12-09	XBB	EPI_ISL_1625314
3026	Riverside	Southern CA	2022-12-08	XBB	EPI_ISL_162533
3089	Los Angeles	Southern CA	2022-12-09	XBB	EPI_ISL_1625341
3101	San Diego	Southern CA	2022-12-09	XBB.1.5	EPI_ISL_1625361
3015	Los Angeles	Southern CA	2022-12-08	XBB	EPI_ISL_162539
2782	Merced	SJVC	2022-12-02	XBB	EPI_ISL_1625424
3149	San Diego	Southern CA	2022-12-10	XBB.1.5	EPI_ISL_1625456
3132	San Diego	Southern CA	2022-12-10	XAY.1	EPI_ISL_1625459
3160	Los Angeles	Southern CA	2022-12-10	XBB	EPI_ISL_1625479
3133	San Diego	Southern CA	2022-12-10	XBB	EPI_ISL_1625496
3124	Los Angeles	Southern CA	2022-12-10	XBB	EPI_ISL_1625557
3031	Los Angeles	Southern CA	2022-12-08	XBB	EPI_ISL_162556
3126	Los Angeles	Southern CA	2022-12-10	XBB	EPI_ISL_1625561
3128	Los Angeles	Southern CA	2022-12-10	XBB	EPI_ISL_1625587
3159	Los Angeles	Southern CA	2022-12-10	XBB	EPI_ISL_1625588
3050	San Diego	Southern CA	2022-12-08	XBB.1.5	EPI_ISL_162559
3134	San Diego	Southern CA	2022-12-10	XBB	EPI_ISL_1625595
3123	San Bernardino	Southern CA	2022-12-10	XBB.1.5	EPI_ISL_1625617
3120	Los Angeles	Southern CA	2022-12-10	Unclassified	EPI_ISL_162563
3158	Orange	Southern CA	2022-12-10	XBB	EPI_ISL_1625638
3127	Los Angeles	Southern CA	2022-12-10	XBB	EPI_ISL_1625647
3121	Los Angeles	Southern CA	2022-12-10	XBB	EPI_ISL_1625659
3166	Los Angeles	Southern CA	2022-12-11	XBB	EPI_ISL_1625692
3167	Los Angeles	Southern CA	2022-12-11	XBB	EPI_ISL_1625713
3191	Los Angeles	Southern CA	2022-12-11	XBB.1.5	EPI_ISL_1625723
3168	Los Angeles	Southern CA	2022-12-11	XBB.1.5	EPI_ISL_1625725
3174	Santa Clara	ABAHO	2022-12-11	XBB	EPI_ISL_1625727
3171	Los Angeles	Southern CA	2022-12-11	XBB	EPI_ISL_1625728
3165	Orange	Southern CA	2022-12-11	XBB	EPI_ISL_1625743
3193	Riverside	Southern CA	2022-12-11	XBB	EPI_ISL_162578
2823	Los Angeles	Southern CA	2022-12-04	XBB	EPI_ISL_1625789
2854	Los Angeles	Southern CA	2022-12-05	XBB	EPI_ISL_1626138
2860	Riverside	Southern CA	2022-12-05	XBB	EPI_ISL_162615
2897	Contra Costa	ABAHO	2022-12-05	XBB	EPI_ISL_1626412
2871	San Diego	Southern CA	2022-12-05	XBB	EPI_ISL_1626417
2872	San Diego	Southern CA	2022-12-05	XBB	EPI_ISL_1626434
2861	Contra Costa	ABAHO	2022-12-05	XBB	EPI_ISL_162645
2902	Los Angeles	Southern CA	2022-12-06	XBB	EPI_ISL_1626479
2906	Orange	Southern CA	2022-12-06	XBB	EPI_ISL_1626541
2881	San Diego	Southern CA	2022-12-05	XBE	EPI_ISL_1626544
2908	Sacramento	Greater Sac	2022-12-06	XBB	EPI_ISL_1626544
2905	San Bernardino	Southern CA	2022-12-06	XBB	EPI_ISL_1626546
2907	Santa Clara	ABAHO	2022-12-06	XBB	EPI_ISL_1626556
2688	Los Angeles	Southern CA	2022-12-01	XBB	EPI_ISL_16265705
2692	Los Angeles	Southern CA	2022-12-01	XBB	EPI_ISL_16265740
2738	Los Angeles	Southern CA	2022-12-02	XBB	EPI_ISL_16265753
2749	San Diego	Southern CA	2022-12-02	XBB	EPI_ISL_16265759
2750	San Diego	Southern CA	2022-12-02	XBB	EPI_ISL_16265806
2771	Los Angeles	Southern CA	2022-12-02	XBD	EPI_ISL_16265816
2769	Los Angeles	Southern CA	2022-12-02	XBB	EPI_ISL_16265828
2770	Los Angeles	Southern CA	2022-12-02	XBB	EPI_ISL_16265864
2767	Los Angeles	Southern CA	2022-12-02	XBB	EPI_ISL_16265871
2773	Riverside	Southern CA	2022-12-02	XBB	EPI_ISL_16265937
2748	San Diego	Southern CA	2022-12-02	XBB	EPI_ISL_16265989
2732	Los Angeles	Southern CA	2022-12-02	XBB	EPI_ISL_16266014
2743	Unknown	Southern CA	2022-12-02	XBB	EPI_ISL_16266015
2791	Orange	Southern CA	2022-12-03	XBB	EPI_ISL_16266042
2786	Unknown	Southern CA	2022-12-03	XBB	EPI_ISL_16266109
2784	Los Angeles	Southern CA	2022-12-03	XBB	EPI_ISL_16266132
2790	Los Angeles	Southern CA	2022-12-03	XBB	EPI_ISL_16266184
2792	Contra Costa	ABAHO	2022-12-03	XBB	EPI_ISL_16266202
2789	Los Angeles	Southern CA	2022-12-03	XBB	EPI_ISL_16266221
2812	Unknown	ABAHO	2022-12-03	XBB	EPI_ISL_16266222
2794	Orange	Southern CA	2022-12-03	XBB	EPI_ISL_16266224
2817	Los Angeles	Southern CA	2022-12-04	XBB	EPI_ISL_16266326
2818	Los Angeles	Southern CA	2022-12-04	XBB	EPI_ISL_16266330
2868	Fresno	SJVC	2022-12-05	XBB.1.5	EPI_ISL_162664
2857	Los Angeles	Southern CA	2022-12-05	XBB.1.5	EPI_ISL_16266400
2852	Los Angeles	Southern CA	2022-12-05	XBB	EPI_ISL_16266433
2853	Los Angeles	Southern CA	2022-12-05	XBB	EPI_ISL_16266463
2869	Riverside	Southern CA	2022-12-05	XBB	EPI_ISL_16266467
2862	Orange	Southern CA	2022-12-05	XBB	EPI_ISL_16266472
2904	Los Angeles	Southern CA	2022-12-06	XBB.1.5	EPI_ISL_16266648
2917	Unknown	Southern CA	2022-12-06	XBB	EPI_ISL_16266667
2946	Los Angeles	Southern CA	2022-12-06	XBB	EPI_ISL_16266683
2950	Ventura	Southern CA	2022-12-06	XBB	EPI_ISL_16266686
2911	Los Angeles	Southern CA	2022-12-06	XBD	EPI_ISL_16266801
2962	Los Angeles	Southern CA	2022-12-07	XBB	EPI_ISL_16266849
2963	Los Angeles	Southern CA	2022-12-07	XBB	EPI_ISL_16266952
2980	San Diego	Southern CA	2022-12-07	XBB	EPI_ISL_16266964
2961	Los Angeles	Southern CA	2022-12-07	XBB	EPI_ISL_16267042
2964	San Mateo	ABAHO	2022-12-07	XBB.1.5	EPI_ISL_16267077
3003	Los Angeles	Southern CA	2022-12-07	XBB.1.5	EPI_ISL_16267112
2971	Los Angeles	Southern CA	2022-12-07	XBB	EPI_ISL_16267145
2970	Los Angeles	Southern CA	2022-12-07	XBB	EPI_ISL_16267170
3020	Los Angeles	Southern CA	2022-12-08	XBB	EPI_ISL_16267194
3066	Orange	Southern CA	2022-12-08	XBB	EPI_ISL_16267264
3022	Los Angeles	Southern CA	2022-12-08	XBB	EPI_ISL_16267278
3068	Solano	ABAHO	2022-12-08	XBB	EPI_ISL_16267308
3062	Los Angeles	Southern CA	2022-12-08	XBB	EPI_ISL_16267326
3023	Los Angeles	Southern CA	2022-12-08	XBB.1.5	EPI_ISL_16267346
3019	Los Angeles	Southern CA	2022-12-08	XBB	EPI_ISL_16267347
3025	Unknown	Southern CA	2022-12-08	XBB	EPI_ISL_16267407
2915	Alameda	ABAHO	2022-12-06	XBB.1.5	EPI_ISL_16267529
3172	Sacramento	Greater Sac	2022-12-11	XBB	EPI_ISL_16268359
3071	Riverside	Southern CA	2022-12-08	XBF	EPI_ISL_16276348
3065	Riverside	Southern CA	2022-12-08	XBB	EPI_ISL_16276354
3018	Orange	Southern CA	2022-12-08	XBB.1.5	EPI_ISL_16276379
3061	Los Angeles	Southern CA	2022-12-08	XBB	EPI_ISL_16276385
3017	Solano	ABAHO	2022-12-08	XBB	EPI_ISL_16276389
3016	Orange	Southern CA	2022-12-08	XBB.1.5	EPI_ISL_16276395
3021	Los Angeles	Southern CA	2022-12-08	XBB	EPI_ISL_16276484
3083	Los Angeles	Southern CA	2022-12-09	XBB	EPI_ISL_1627653
3080	Los Angeles	Southern CA	2022-12-09	XBB	EPI_ISL_16276533
3079	Los Angeles	Southern CA	2022-12-09	XBB	EPI_ISL_16276597
3073	Unknown	Southern CA	2022-12-09	XBB	EPI_ISL_16276616
3119	Los Angeles	Southern CA	2022-12-10	XBB	EPI_ISL_16276671
3122	Los Angeles	Southern CA	2022-12-10	XBB	EPI_ISL_16276684
3248	Unknown	ABAHO	2022-12-12	XBB	EPI_ISL_16276734
3213	Orange	Southern CA	2022-12-12	XBB	EPI_ISL_16276737
3154	Los Angeles	Southern CA	2022-12-10	XBB	EPI_ISL_1627674
3209	Los Angeles	Southern CA	2022-12-12	XBD	EPI_ISL_16276783
3215	Los Angeles	Southern CA	2022-12-12	XBB	EPI_ISL_16276787
3208	Los Angeles	Southern CA	2022-12-12	XBB	EPI_ISL_16276823
3246	Unknown	Southern CA	2022-12-12	XBB	EPI_ISL_16276826
2966	Orange	Southern CA	2022-12-07	XBB.1.5	EPI_ISL_16277939
3474	San Mateo	ABAHO	2022-12-17	XBB	EPI_ISL_16278353
3380	San Mateo	ABAHO	2022-12-15	XBB	EPI_ISL_16278368
3325	San Mateo	ABAHO	2022-12-14	XBB	EPI_ISL_16278371
3473	San Mateo	ABAHO	2022-12-17	XBB	EPI_ISL_16278378
3381	San Mateo	ABAHO	2022-12-15	XBB	EPI_ISL_16278384
3268	Santa Clara	ABAHO	2022-12-13	XBB.1.5	EPI_ISL_16293269
3267	San Bernardino	Southern CA	2022-12-13	XBB.1.5	EPI_ISL_16293275
3295	Unknown	Southern CA	2022-12-13	XBB.1.5	EPI_ISL_16293276
3270	San Bernardino	Southern CA	2022-12-13	XBB	EPI_ISL_16293373
3260	Los Angeles	Southern CA	2022-12-13	XBB	EPI_ISL_16293426
3272	Los Angeles	Southern CA	2022-12-13	XBB.1.5	EPI_ISL_16293441
3263	Los Angeles	Southern CA	2022-12-13	XBB.1.5	EPI_ISL_16293463
3349	Riverside	Southern CA	2022-12-14	XBB	EPI_ISL_16293473
3350	Los Angeles	Southern CA	2022-12-14	XBB	EPI_ISL_16293482
3315	Orange	Southern CA	2022-12-14	XBB.1.5	EPI_ISL_16293488
3308	Orange	Southern CA	2022-12-14	XBB	EPI_ISL_16293493
3309	Riverside	Southern CA	2022-12-14	XBB.1.5	EPI_ISL_16293517
3310	San Bernardino	Southern CA	2022-12-14	XBB	EPI_ISL_1629353
3348	Unknown	Greater Sac	2022-12-14	XBB.1.5	EPI_ISL_16293541
3320	Los Angeles	Southern CA	2022-12-14	XBB	EPI_ISL_16293562
3314	Los Angeles	Southern CA	2022-12-14	XBB	EPI_ISL_16293565
3286	Unknown	Unknown	2022-12-13	XBB	EPI_ISL_16308915
2532	Unknown	Unknown	2022-11-28	XBB	EPI_ISL_16309805
2388	Unknown	Unknown	2022-11-25	XBB	EPI_ISL_16310081
2420	Unknown	Unknown	2022-11-26	XBB	EPI_ISL_16310426
2548	Unknown	Unknown	2022-11-28	XBF	EPI_ISL_16310474
2470	Unknown	Unknown	2022-11-27	XBB	EPI_ISL_16310477
2196	San Francisco	ABAHO	2022-11-20	XBB	EPI_ISL_16312736
2206	San Francisco	ABAHO	2022-11-20	XBB	EPI_ISL_16312737
2280	Unknown	Unknown	2022-11-22	XBB	EPI_ISL_16314001
2764	Unknown	Unknown	2022-12-02	XBB	EPI_ISL_16314109
2807	Unknown	Unknown	2022-12-03	XBB	EPI_ISL_16314383
2808	Unknown	Unknown	2022-12-03	XBB	EPI_ISL_16314384
2742	Unknown	Southern CA	2022-12-02	XBB	EPI_ISL_16314387
3130	San Bernardino	Southern CA	2022-12-10	XBE	EPI_ISL_16319457
3201	Los Angeles	Southern CA	2022-12-12	XBB	EPI_ISL_16321512
3216	Los Angeles	Southern CA	2022-12-12	XBB	EPI_ISL_16321524
3262	Los Angeles	Southern CA	2022-12-13	XBB	EPI_ISL_16321578
3300	Riverside	Southern CA	2022-12-13	XBB.1.5	EPI_ISL_16321675
3296	Placer	Greater Sac	2022-12-13	XBB	EPI_ISL_1632169
3258	Los Angeles	Southern CA	2022-12-13	XBB	EPI_ISL_16321694
3264	Los Angeles	Southern CA	2022-12-13	XBB	EPI_ISL_16321749
3261	Los Angeles	Southern CA	2022-12-13	XBB	EPI_ISL_1632175
3294	Los Angeles	Southern CA	2022-12-13	XBB	EPI_ISL_16321753
3259	Los Angeles	Southern CA	2022-12-13	XBB	EPI_ISL_16321779
3326	San Diego	Southern CA	2022-12-14	XBB	EPI_ISL_16322519
3324	San Francisco	ABAHO	2022-12-14	XBB.1.5	EPI_ISL_16322616
3322	Los Angeles	Southern CA	2022-12-14	XBB.1.5	EPI_ISL_1632274
3311	Riverside	Southern CA	2022-12-14	XBB.1.5	EPI_ISL_16322782
3323	Los Angeles	Southern CA	2022-12-14	XBB.1.5	EPI_ISL_1632281
3313	Orange	Southern CA	2022-12-14	XBB.1.5	EPI_ISL_16322821
3306	Los Angeles	Southern CA	2022-12-14	XBB.1.5	EPI_ISL_16322834
3370	Los Angeles	Southern CA	2022-12-15	XBB	EPI_ISL_16322867
3369	Los Angeles	Southern CA	2022-12-15	XBB.1.5	EPI_ISL_16322917
3377	Orange	Southern CA	2022-12-15	XBB.1.5	EPI_ISL_1632295
3409	Los Angeles	Southern CA	2022-12-15	XBB.1.5	EPI_ISL_16322972
3367	Los Angeles	Southern CA	2022-12-15	XBB	EPI_ISL_16322991
3368	Los Angeles	Southern CA	2022-12-15	XBB	EPI_ISL_1632315
3455	Contra Costa	ABAHO	2022-12-16	XBB.1.5	EPI_ISL_16323168
3423	Los Angeles	Southern CA	2022-12-16	XBJ	EPI_ISL_16323170
3418	Los Angeles	Southern CA	2022-12-16	XBB	EPI_ISL_16323174
3378	San Joaquin	SJVC	2022-12-15	XBB	EPI_ISL_1632318
3419	Los Angeles	Southern CA	2022-12-16	XBB.1.5	EPI_ISL_16323182
3468	Los Angeles	Southern CA	2022-12-17	XBB.1.5	EPI_ISL_1632325
3359	Los Angeles	Southern CA	2022-12-15	XBB	EPI_ISL_163234
3379	San Mateo	ABAHO	2022-12-15	XBB	EPI_ISL_163237
3357	Los Angeles	Southern CA	2022-12-15	XBB	EPI_ISL_1632386
3361	Los Angeles	Southern CA	2022-12-15	XBB	EPI_ISL_1632394
3169	Los Angeles	Southern CA	2022-12-11	XBE	EPI_ISL_1632559
3287	Unknown	Unknown	2022-12-13	XBB	EPI_ISL_16344457
3341	Unknown	Unknown	2022-12-14	XBB.1.5	EPI_ISL_16344462
3288	Unknown	Unknown	2022-12-13	XBB	EPI_ISL_16344464
3218	Sonoma	ABAHO	2022-12-12	XBB.1.5	EPI_ISL_16346033
3724	San Mateo	ABAHO	2022-12-22	XBB	EPI_ISL_16350554
3725	San Mateo	ABAHO	2022-12-22	XBB	EPI_ISL_16350570
3074	Riverside	Southern CA	2022-12-09	XBB	EPI_ISL_16353144
3115	Riverside	Southern CA	2022-12-09	XBB	EPI_ISL_16353145
3297	Santa Clara	ABAHO	2022-12-13	XBB	EPI_ISL_16353146
3210	Ventura	Southern CA	2022-12-12	XBB	EPI_ISL_16353149
3090	Santa Cruz	ABAHO	2022-12-09	XBB	EPI_ISL_16353157
3129	Napa	ABAHO	2022-12-10	XBB.1.5	EPI_ISL_163532
3157	Fresno	SJVC	2022-12-10	XBB	EPI_ISL_1635327
3274	Alameda	ABAHO	2022-12-13	XBB	EPI_ISL_16353271
3131	Contra Costa	ABAHO	2022-12-10	XBB	EPI_ISL_16353274
3212	Ventura	Southern CA	2022-12-12	XBB	EPI_ISL_16353285
3206	Ventura	Southern CA	2022-12-12	XBB	EPI_ISL_16353286
3202	San Joaquin	SJVC	2022-12-12	XBB.1.5	EPI_ISL_163533
3179	San Diego	Southern CA	2022-12-11	XBB	EPI_ISL_16353312
3224	San Diego	Southern CA	2022-12-12	XBB	EPI_ISL_16353316
3225	San Diego	Southern CA	2022-12-12	XBB	EPI_ISL_16353317
3226	San Diego	Southern CA	2022-12-12	XBB	EPI_ISL_16353318
3284	San Diego	Southern CA	2022-12-13	XBB	EPI_ISL_1635332
3180	San Diego	Southern CA	2022-12-11	XBB	EPI_ISL_16353321
3227	San Diego	Southern CA	2022-12-12	XBB	EPI_ISL_16353324
3228	San Diego	Southern CA	2022-12-12	XBB	EPI_ISL_16353325
3181	San Diego	Southern CA	2022-12-11	XBB	EPI_ISL_16353328
3182	San Diego	Southern CA	2022-12-11	XBB	EPI_ISL_16353329
3135	San Diego	Southern CA	2022-12-10	XBB	EPI_ISL_1635333
3183	San Diego	Southern CA	2022-12-11	XBB	EPI_ISL_16353332
3184	San Diego	Southern CA	2022-12-11	XBB	EPI_ISL_16353333
3229	San Diego	Southern CA	2022-12-12	XBB	EPI_ISL_16353334
3230	San Diego	Southern CA	2022-12-12	XBB	EPI_ISL_16353335
3136	San Diego	Southern CA	2022-12-10	XBB	EPI_ISL_16353337
3137	San Diego	Southern CA	2022-12-10	XBB	EPI_ISL_16353338
3139	San Diego	Southern CA	2022-12-10	XBB	EPI_ISL_16353339
3140	San Diego	Southern CA	2022-12-10	XBB	EPI_ISL_1635334
3141	San Diego	Southern CA	2022-12-10	XBB	EPI_ISL_16353341
3142	San Diego	Southern CA	2022-12-10	XBB	EPI_ISL_16353342
3143	San Diego	Southern CA	2022-12-10	XBB	EPI_ISL_16353343
3177	San Diego	Southern CA	2022-12-11	XBB	EPI_ISL_1635337
3178	San Diego	Southern CA	2022-12-11	XBB	EPI_ISL_1635338
3273	Santa Clara	ABAHO	2022-12-13	XBB.1.5	EPI_ISL_1635342
3247	Ventura	Southern CA	2022-12-12	XBB	EPI_ISL_16353432
3214	Imperial	Southern CA	2022-12-12	XBB	EPI_ISL_16353436
3163	Imperial	Southern CA	2022-12-10	XBB	EPI_ISL_16353453
3108	Imperial	Southern CA	2022-12-09	XBB	EPI_ISL_16353455
3109	Imperial	Southern CA	2022-12-09	XBB	EPI_ISL_16353456
3112	Imperial	Southern CA	2022-12-09	XBB	EPI_ISL_16353457
3111	Imperial	Southern CA	2022-12-09	XBB	EPI_ISL_16353459
3110	Imperial	Southern CA	2022-12-09	XBB	EPI_ISL_1635346
3164	Imperial	Southern CA	2022-12-10	XBB	EPI_ISL_16353462
3117	Imperial	Southern CA	2022-12-09	XBB	EPI_ISL_16353468
3116	Imperial	Southern CA	2022-12-09	XBB	EPI_ISL_16353469
3114	Imperial	Southern CA	2022-12-09	XBB	EPI_ISL_1635347
3231	Los Angeles	Southern CA	2022-12-12	XBB	EPI_ISL_1635347
3113	Imperial	Southern CA	2022-12-09	XBB	EPI_ISL_16353471
3070	Imperial	Southern CA	2022-12-08	XBB	EPI_ISL_16353474
3069	Imperial	Southern CA	2022-12-08	XBB	EPI_ISL_16353475
3162	Imperial	Southern CA	2022-12-10	XBB	EPI_ISL_16353477
3161	Imperial	Southern CA	2022-12-10	XBB	EPI_ISL_16353478
3195	Imperial	Southern CA	2022-12-11	XBB	EPI_ISL_1635348
3196	Imperial	Southern CA	2022-12-11	XBB	EPI_ISL_16353481
3197	Imperial	Southern CA	2022-12-11	XBB	EPI_ISL_16353483
3198	Imperial	Southern CA	2022-12-11	XBB	EPI_ISL_16353484
3199	Imperial	Southern CA	2022-12-11	XBB	EPI_ISL_16353485
3200	Imperial	Southern CA	2022-12-11	XBB	EPI_ISL_16353486
3253	Imperial	Southern CA	2022-12-12	XBB	EPI_ISL_16353488
3254	Imperial	Southern CA	2022-12-12	XBB	EPI_ISL_16353489
3255	Imperial	Southern CA	2022-12-12	XBB	EPI_ISL_16353491
3303	Imperial	Southern CA	2022-12-13	XBB	EPI_ISL_16353493
3302	Imperial	Southern CA	2022-12-13	XBB	EPI_ISL_16353494
3082	Lake	RANCHO	2022-12-09	XBB	EPI_ISL_16353515
3091	Alameda	ABAHO	2022-12-09	XBB	EPI_ISL_1635352
3170	Ventura	Southern CA	2022-12-11	XBB	EPI_ISL_1635354
2349	Imperial	Southern CA	2022-11-24	XBB	EPI_ISL_16353581
2355	Imperial	Southern CA	2022-11-24	XBB	EPI_ISL_16353582
3125	Los Angeles	Southern CA	2022-12-10	XBB	EPI_ISL_1635363
2338	San Diego	Southern CA	2022-11-24	XBB	EPI_ISL_16353653
3041	San Diego	Southern CA	2022-12-08	XBB	EPI_ISL_16353655
3042	San Diego	Southern CA	2022-12-08	XBB	EPI_ISL_16353657
3043	San Diego	Southern CA	2022-12-08	XBB	EPI_ISL_16353662
3044	San Diego	Southern CA	2022-12-08	XBB	EPI_ISL_16353665
3045	San Diego	Southern CA	2022-12-08	XBB	EPI_ISL_16353667
3046	San Diego	Southern CA	2022-12-08	XBB	EPI_ISL_16353668
3047	San Diego	Southern CA	2022-12-08	XBB	EPI_ISL_16353669
3048	San Diego	Southern CA	2022-12-08	XBB	EPI_ISL_16353672
3049	San Diego	Southern CA	2022-12-08	XBB	EPI_ISL_16353673
3092	San Diego	Southern CA	2022-12-09	XBB	EPI_ISL_1635368
3093	San Diego	Southern CA	2022-12-09	XBB	EPI_ISL_16353682
3094	San Diego	Southern CA	2022-12-09	XBB	EPI_ISL_16353683
3144	San Diego	Southern CA	2022-12-10	XBB	EPI_ISL_16353687
3145	San Diego	Southern CA	2022-12-10	XBB	EPI_ISL_16353694
3095	San Diego	Southern CA	2022-12-09	XBB	EPI_ISL_16353695
3096	San Diego	Southern CA	2022-12-09	XBB	EPI_ISL_16353696
3097	San Diego	Southern CA	2022-12-09	XBB	EPI_ISL_16353697
3098	San Diego	Southern CA	2022-12-09	XBB	EPI_ISL_16353698
3146	San Diego	Southern CA	2022-12-10	XBB	EPI_ISL_163537
3147	San Diego	Southern CA	2022-12-10	XBB	EPI_ISL_1635371
3099	San Diego	Southern CA	2022-12-09	XBB	EPI_ISL_1635372
3100	San Diego	Southern CA	2022-12-09	XBB	EPI_ISL_1635374
2841	Unknown	Unknown	2022-12-04	XBB	EPI_ISL_16361370
2887	Unknown	Unknown	2022-12-05	XBB	EPI_ISL_16361413
2778	Unknown	Southern CA	2022-12-02	XBB	EPI_ISL_16361432
2825	Unknown	Southern CA	2022-12-04	XBB.1.5	EPI_ISL_16361439
2882	Unknown	Unknown	2022-12-05	XBB	EPI_ISL_16361488
2863	Unknown	Southern CA	2022-12-05	XBB.1.5	EPI_ISL_16361491
3420	Los Angeles	Southern CA	2022-12-16	XBB.1.5	EPI_ISL_1636153
2539	Unknown	Unknown	2022-11-28	XBB	EPI_ISL_16361604
2842	Unknown	Unknown	2022-12-04	XBB.1.5	EPI_ISL_16361628
2884	Unknown	Unknown	2022-12-05	XBB	EPI_ISL_16361638
2890	Unknown	Unknown	2022-12-05	XBB	EPI_ISL_16361743
2492	Unknown	Southern CA	2022-11-28	XBB	EPI_ISL_16361745
3451	Los Angeles	Southern CA	2022-12-16	XBB	EPI_ISL_163618
2811	Unknown	Unknown	2022-12-03	XBF	EPI_ISL_16361841
2889	Unknown	Unknown	2022-12-05	XBB	EPI_ISL_16361847
2843	Unknown	Unknown	2022-12-04	XBB.1.5	EPI_ISL_16361864
3428	Riverside	Southern CA	2022-12-16	XBB	EPI_ISL_1636191
3429	Riverside	Southern CA	2022-12-16	XBB	EPI_ISL_1636192
2568	Unknown	Southern CA	2022-11-28	XBF	EPI_ISL_16361968
2666	Unknown	Unknown	2022-11-30	XBB	EPI_ISL_16361974
2891	Unknown	Unknown	2022-12-05	XBB	EPI_ISL_16361977
2600	Unknown	Unknown	2022-11-29	XBB	EPI_ISL_16362032
2473	Unknown	Unknown	2022-11-27	XBB	EPI_ISL_16362036
2510	Unknown	Southern CA	2022-11-28	XBB	EPI_ISL_16362102
[truncated: 2,214 more rows]
